# Supplementary material for: The effects of intravitreal injections on intraocular pressure and retinal nerve fiber layer: a systematic review and meta-analysis
Source: PubMed Central journal article supplement (PMC7411061; doi:10.1038/s41598-020-70269-7), 2020-08-06
Supplement: 41598_2020_70269_MOESM1_ESM.pdf [file 41598_2020_70269_MOESM1_ESM.pdf]

## Supplementary appendix

### **The effects of intravitreal injections on intraocular pressure and retinal nerve fiber layer: a systematic review and meta-analysis**

#### Contents:

- TABLE S1: Summary of the retrieved studies from the systematic review
- TABLE S2: Quality assessment of the included non-randomized studies according to the Newcastle-Ottawa Scale
- TABLE S3: Quality assessment of the included randomized studies according to the Cochrane Risk of Bias Tool for Randomized Controlled Trials
- TABLE S4: Assessment of Certainty of Evidence using Grading of Recommendations, Assessment, Development, and Evaluation
- FIGURE S1: Weighted mean difference in intraocular pressure during follow-up after bevacizumab intravitreal injection.
- FIGURE S2: Meta-analyses for the association of bevacizumab with IOP.
- FIGURE S3: Weighted mean difference in intraocular pressure during follow-up after ranibizumab intravitreal injection.
- FIGURE S4: Meta-analyses for the association of ranibizumab with IOP.
- FIGURE S5: Meta-analyses for the association of anti-VEGF with IOP.
- FIGURE S6: Meta-analyses for the association of dexamethasone implant with IOP.

TABLE S1. Summary of the retrieved studies from the systematic review

| STUDY                 | STUDY DESIGN              | INDICATION(S)                                  | METHOD USED FOR OUTCOME MEASUREMENT | N (eyes) | INTRAVITREAL INJECTION TYPE(S) | EYES RECEIVING IOP-LOWERING TREATMENT (%) |
|-----------------------|---------------------------|------------------------------------------------|-------------------------------------|----------|--------------------------------|-------------------------------------------|
| <b>IOP</b>            |                           |                                                |                                     |          |                                |                                           |
| Alagöz et al.         | prospective cohort        | ME secondary to DRP, RVO                       | Tono-Pen applanation                | 34       | dexamethasone implant          | 0%                                        |
| Alba-Linero et al.    | prospective cohort        | uveitis                                        | N/A                                 | 79       | dexamethasone implant          | 31.5%                                     |
| Ali et al.            | RCT                       | DME                                            | Goldmann applanation                | 30       | dexamethasone implant          | 0%                                        |
| Arikan et al.         | prospective cohort        | AMD, DRP, RVO, cystoid ME, other (unspecified) | Perkins hand-held tonometer         | 106      | ranibizumab                    | N/A                                       |
| Arikan Yogun et al.   | retrospective cohort      | DME                                            | N/A                                 | 41       | dexamethasone implant          | 33%                                       |
| Arrascue et al.       | retrospective cohort      | ME                                             | N/A                                 | 37       | dexamethasone implant          | 56.7%                                     |
| Ayar et al.           | retrospective cohort      | BRVO                                           | N/A                                 | 26       | dexamethasone implant          | 38%                                       |
| Al-Khersan et al.     | retrospective cohort      | DME                                            | Goldmann applanation                | 17       | dexamethasone implant          | 82.4%                                     |
| Bansal et al.         | retrospective cohort      | recalcitrant DME                               | Goldmann applanation                | 67       | dexamethasone implant          | 12%                                       |
| Bellocq et al. (2015) | retrospective case series | ME                                             | applanation (unspecified)           | 50       | dexamethasone implant          | 20%                                       |
| Bellocq et al. (2017) | retrospective case series | ME                                             | applanation (unspecified)           | 100      | dexamethasone implant          | 21%                                       |
| Bulut et al.          | prospective cohort        | ME secondary to BRVO                           | applanation (unspecified)           | 33       | dexamethasone implant          | N/A                                       |
| Cacciamani et al.     | prospective cohort        | nAMD                                           | Tono-Pen applanation                | 25       | bevacizumab                    | 4%                                        |
| Choi et al.           | retrospective cohort      | ME                                             | NCT or Goldmann applanation         | 540      | dexamethasone implant          | 60%                                       |
| Coskun et al.         | retrospective cohort      | active Behçet posterior uveitis                | Goldmann applanation                | 17       | dexamethasone implant          | 17%                                       |
| Cunha et al.          | clinical trial            | BRVO, CRVO                                     | Goldmann applanation                | 10       | dexamethasone implant          | 30%                                       |
| Demirel et al.        | retrospective cohort      | RVO, DME, AMD                                  | NCT                                 | 202      | ranibizumab                    | 0.5%                                      |
| Ding et al.           | RCT                       | ME                                             | Goldmann applanation                | 16       | bevacizumab                    | 0%                                        |
| el-Chehab et al.      | prospective cohort        | wet AMD                                        | Perkins tonometer                   | 30       | aflibercept                    | N/A                                       |
| Faghihi et al.        | prospective case series   | bilateral naive DME                            | N/A                                 | 64       | bevacizumab                    | N/A                                       |

|                    |                      |                                                                                        |                                |     |                                                 |       |
|--------------------|----------------------|----------------------------------------------------------------------------------------|--------------------------------|-----|-------------------------------------------------|-------|
| Falkenstein et al. | RCT                  | nAMD                                                                                   | Goldmann applanation / TonoPen | 70  | bevacizumab                                     | N/A   |
| Frère et al.       | retrospective cohort | active noninfectious uveitis                                                           | applanation (unspecified)      | 20  | dexamethasone implant                           | 49.6% |
| Fuest et al.       | prospective cohort   | ME due to either wet AMD, DM or RVO                                                    | rebound tonometry (i-care)     | 29  | ranibizumab                                     | N/A   |
| Gado et al.        | RCT                  | CRVO with ME                                                                           | Goldmann applanation           | 30  | bevacizumab, dexamethasone implant              | 20%   |
| Gismondi et al.    | prospective cohort   | nAMD                                                                                   | Tono-Pen applanation           | 54  | ranibizumab                                     | 0%    |
| Goktas et al.      | prospective cohort   | wet-type subfoveal/juxtafoveal choroidal neovascular membrane                          | NCT                            | 31  | ranibizumab                                     | N/A   |
| Gregori et al.     | RCT                  | various indications (unspecified)                                                      | Tono-Pen applanation           | 48  | ranibizumab                                     | N/A   |
| Guler et al.       | clinical trial       | AMD, CRVO, BRVO, DME, diabetic vitreous hemorrhage, retinal artery macroaneurysm, CSCR | Goldmann applanation           | 43  | bevacizumab                                     | N/A   |
| Higashiyama et al. | RCT                  | ME secondary to BRVO                                                                   | N/A                            | 22  | bevacizumab                                     | 0%    |
| Hohn et al.        | prospective cohort   | AMD                                                                                    | Schiotz tonometry              | 31  | ranibizumab                                     | N/A   |
| Hollands et al.    | prospective cohort   | nAMD, glaucoma, DME, other (unspecified)                                               | Goldmann applanation           | 104 | bevacizumab                                     | 1%    |
| Jaffar et al.      | prospective cohort   | DME                                                                                    | Goldmann applanation           | 100 | bevacizumab                                     | N/A   |
| Jo et al.          | prospective cohort   | unilateral exudative AMD                                                               | Goldmann applanation           | 20  | ranibizumab                                     | N/A   |
| Kaldirim et al.    | retrospective cohort | ME secondary to BRVO                                                                   | Goldmann applanation           | 22  | ranibizumab, aflibercept, dexamethasone implant | 25%   |
| Karakurt et al.    | retrospective cohort | AMD, CRVO, BRVO or DME                                                                 | Icare rebound tonometry        | 81  | ranibizumab, aflibercept, dexamethasone implant | N/A   |
| Kernt et al.       | case series          | unspecified                                                                            | Goldmann applanation           | 45  | bevacizumab                                     | 0%    |
| Kim, D et al.      | retrospective cohort | AMD                                                                                    | NCT                            | 83  | bevacizumab                                     | 3.6%  |
| Kim, GN et al.     | clinical trial       | AMD CNV, idiopathic CNV, RVO, DRP, myopic CNV                                          | pneumatometer                  | 10  | bevacizumab, ranibizumab                        | 0%    |
| Kim, JY et al.     | retrospective cohort | ME from BRVO                                                                           | Goldmann applanation           | 22  | bevacizumab                                     | N/A   |
| Lee, K et al.      | clinical trial       | CNV, RVO, other (unspecified)                                                          | Goldmann applanation           | 61  | bevacizumab                                     | N/A   |
| Lee, JW et al.     | prospective cohort   | DME, PDR, AMD, RVO related ME, CSC, ICNV                                               | Icare rebound tonometry        | 65  | anti-VEGF                                       | N/A   |
| Lemos et al.       | prospective cohort   | ME or active choroidal neovascularization                                              | Goldmann applanation           | 106 | bevacizumab                                     | 20.8% |
| Lemos-Reis et al.  | prospective cohort   | AMD, myopia, DME, BRVO, pseudoxanthoma                                                 | Icare rebound tonometry        | 291 | bevacizumab                                     | N/A   |

|                   |                          |                                                                        |                                                |     |                          |       |
|-------------------|--------------------------|------------------------------------------------------------------------|------------------------------------------------|-----|--------------------------|-------|
|                   |                          | elasticum, uveitis, idiopathic                                         |                                                |     |                          |       |
| Lim et al.        | prospective cohort       | AMD, RVO, DRP, CSCR                                                    | Tono-Pen applanation                           | 25  | bevacizumab              | N/A   |
| Marey et al.      | prospective cohort       | DRP                                                                    | N/A                                            | 30  | bevacizumab              | 0%    |
| Mazzarella et al. | retrospective cohort     | ME                                                                     | Goldmann applanation                           | 65  | dexamethasone implant    | 12.3% |
| Mazzulla et al.   | retrospective cohort     | unspecified                                                            | Goldmann applanation                           | 29  | bevacizumab              | 0%    |
| Mishra et al.     | RCT                      | ME secondary to CRVO                                                   | Goldmann applanation                           | 20  | dexamethasone implant    | 25%   |
| Murray et al.     | RCT                      | nAMD                                                                   | Tono-Pen applanation                           | 12  | ranibizumab              | N/A   |
| Nalcaci et al.    | retrospective cohort     | DME                                                                    | N/A                                            | 20  | dexamethasone implant    | 25%   |
| Omay et al.       | prospective cohort       | exudative AMD, ME secondary to RVO/DM/CSCR                             | NCT                                            | 97  | bevacizumab, ranibizumab | N/A   |
| Özata et al.      | retrospective cohort     | persistent DME                                                         | Goldmann applanation                           | 50  | dexamethasone implant    | 10%   |
| Ozkan et al.      | retrospective cohort     | ME                                                                     | air tonometry                                  | 21  | bevacizumab              | N/A   |
| Özkaya et al.     | RCT                      | AMD                                                                    | Goldmann applanation                           | 35  | ranibizumab              | N/A   |
| Park et al.       | prospective cohort       | BRVO, AMD, DRP, CRVO, DME                                              | NCT (rebound tonometer where NCT not possible) | 42  | bevacizumab              | N/A   |
| Pohlmann et al.   | prospective cohort       | noninfectious uveitis                                                  | N/A                                            | 109 | dexamethasone implant    | 4.5%  |
| Ramezani et al.   | RCT                      | CRVO                                                                   | Goldmann applanation                           | 43  | bevacizumab              | 0%    |
| Rebolleda et al.  | prospective cohort       | nAMD                                                                   | Perkins tonometer                              | 30  | aflibercept              | N/A   |
| Rensch et al.     | clinical trial           | non-ischaemic CRVO                                                     | Goldmann applanation                           | 25  | bevacizumab              | N/A   |
| Ryder et al.      | retrospective cohort     | noninfectious posterior uveitis, ME secondary to RVO                   | N/A                                            | 22  | dexamethasone implant    | 18.2% |
| Sengul et al.     | clinical trial           | nAMD                                                                   | Tono-Pen applanation                           | 62  | ranibizumab              | N/A   |
| Soheilian et al.  | RCT                      | NPDR with ME, wet-type AMD                                             | Tono-Pen applanation                           | 44  | bevacizumab              | N/A   |
| Song JH et al.    | retrospective cohort     | DME                                                                    | Tono-Pen applanation                           | 38  | bevacizumab              | 0%    |
| Song, S et al.    | prospective case control | exudative AMD, DME, RVO, pathologic myopia, idiopathic CNV, cystoid ME | NCT                                            | 203 | ranibizumab              | N/A   |
| Tas et al.        | retrospective cohort     | diffuse or cystoid DME                                                 | Goldmann applanation                           | 40  | bevacizumab              | 0%    |
| Totan et al.      | prospective cohort       | DME                                                                    | Tono-Pen applanation                           | 30  | bevacizumab              | 13.3% |
| Tsai et al.       | retrospective cohort     | ME secondary to BRVO/CRVO                                              | NCT                                            | 23  | bevacizumab              | N/A   |
| Unsal et al.      | retrospective cohort     | DME                                                                    | Goldmann applanation                           | 46  | dexamethasone implant    | 32%   |



|                            |                            |                                                    |                                                                                    |     |                          |       |
|----------------------------|----------------------------|----------------------------------------------------|------------------------------------------------------------------------------------|-----|--------------------------|-------|
| Yilmaz et al.              | prospective cohort         | DME, ME secondary to RVO                           | Pascal tonometry                                                                   | 34  | dexamethasone implant    | N/A   |
| Zarranz-Ventura et al.     | retrospective cohort       | noninfectious uveitis with vitritis or CME or both | N/A                                                                                | 146 | dexamethasone implant    | 42.6% |
| <b>RNFL</b>                |                            |                                                    |                                                                                    |     |                          |       |
| Bulut et al.               | prospective cohort         | ME secondary to BRVO                               | peripapillary scan, using and undefined OCT device                                 | 33  | dexamethasone implant    |       |
| Demirel et al.             | retrospective cohort       | AMD                                                | papillary blockscan + peripapillary nasal sector scan, using Cirrus OCT            | 29  | ranibizumab              |       |
| Enders et al.              | retrospective cohort       | CNV secondary to AMD                               | peripapillary scan, using Spectralis OCT                                           | 32  | anti-VEGF (unspecified)  |       |
| Entezari et al.            | prospective cohort         | neovasculair AMD                                   | peripapillary scan, using Spectral OCT                                             | 25  | bevacizumab              |       |
| Horsley et al.             | retrospective cohort       | AMD                                                | peripapillary scan using an undefined OCT device                                   | 41  | anti-VEGF (unspecified)  |       |
| Hwang et al.               | retrospective case-control | DRP (with and without DME)                         | peripapillary scan + papillary blockscan + macular blockscan, using Spectralis OCT | 42  | bevacizumab              |       |
| Jo et al.                  | prospective cohort         | unilateral exudative AMD                           | peripapillary scan + papillary blockscan, using Cirrus OCT                         | 20  | ranibizumab              |       |
| Martinez-de-la-Casa et al. | prospective cohort         | neovascular AMD                                    | peripapillary scan + macular blockscan, using Spectralis OCT                       | 49  | ranibizumab              |       |
| Parlak et al.              | prospective cohort         | exudative AMD                                      | peripapillary scan, using Spectralis OCT                                           | 30  | ranibizumab              |       |
| Saatci et al               | retrospective cohort       | NAION                                              | peripapillary scan, using Heidelberg Spectralis OCT                                | 17  | ranibizumab              |       |
| Sengul et al.              | clinical trial             | nAMD                                               | peripapillary scan, using an Optuvec OCT device                                    | 168 | ranibizumab              |       |
| Shin et al.                | retrospective cohort       | ME secondary to AMD, DMR or RVO                    | peripapillary scan + macular blockscan, using                                      | 82  | ranibizumab, bevacizumab |       |

|               |                      |         |                                       |    |                          |  |
|---------------|----------------------|---------|---------------------------------------|----|--------------------------|--|
|               |                      |         | Spectralis OCT                        |    |                          |  |
| Sobaci et al. | retrospective cohort | wet AMD | peripapillary scan, using Stratus OCT | 65 | bevacizumab, ranibizumab |  |

IOP = Intraocular pressure; ME = macular edema; DRP = diabetic retinopathy; RVO = retinal vein occlusion; DME = diabetic macular edema; AMD = age-related macular degeneration; BRVO = branch retinal vein occlusion; CRVO = central retinal vein occlusion; nAMD = neovascular age-related macular degeneration; CNV = choroidal neovascularization; CSCR = central serous chorioretinopathy; PDR = proliferative diabetic retinopathy; NPDR = non-proliferative diabetic retinopathy; ICNV = idiopathic choroidal neovascularization; CSC = central serous retinopathy; NAION = non-arteritic anterior ischemic optic neuropathy; NCT = non-contact tonometer; RNFL = retinal nerve fiber layer; OCT = optical coherence tomography; RCT = randomized controlled trial

TABLE S2. Quality assessment of the included non-randomized studies according to the Newcastle-Ottawa Scale\*

| Author                | Design                     | Selection | Comparability | Outcome (cohort)/ Exposure (case-control) | Total score (max.9) |
|-----------------------|----------------------------|-----------|---------------|-------------------------------------------|---------------------|
| Alagöz et al.         | prospective cohort         | 4         | 2             | 3                                         | 9                   |
| Alba-Linero et al.    | prospective cohort         | 4         | 2             | 2                                         | 8                   |
| Arikan G et al.       | prospective cohort         | 4         | 2             | 2                                         | 8                   |
| Arikan Yogun et al.   | retrospective cohort       | 4         | 2             | 2                                         | 8                   |
| Arrascue et al.       | retrospective cohort       | 4         | 1             | 3                                         | 8                   |
| Ayar et al.           | retrospective cohort       | 4         | 2             | 2                                         | 8                   |
| Al-Khersan et al.     | retrospective cohort       | 4         | 2             | 2                                         | 8                   |
| Bansal et al.         | retrospective cohort       | 4         | 2             | 3                                         | 9                   |
| Bellocq et al. (2015) | retrospective case series  | 4         | 2             | 3                                         | 9                   |
| Bellocq et al. (2017) | retrospective case series  | 4         | 2             | 3                                         | 9                   |
| Bulut et al.          | prospective cohort         | 4         | 2             | 3                                         | 9                   |
| Cacciamani et al.     | prospective cohort         | 4         | 2             | 3                                         | 9                   |
| Choi et al.           | retrospective cohort       | 4         | 2             | 3                                         | 9                   |
| Coskun et al.         | retrospective cohort       | 4         | 2             | 3                                         | 9                   |
| Cunha et al.          | clinical trial             | 4         | 2             | 3                                         | 9                   |
| Demirel et al.        | retrospective cohort       | 4         | 2             | 3                                         | 9                   |
| el-Chehab             | prospective cohort         | 4         | 2             | 3                                         | 9                   |
| Enders et al.         | retrospective cohort       | 4         | 2             | 3                                         | 9                   |
| Entezari et al.       | prospective cohort         | 4         | 2             | 3                                         | 8                   |
| Faghihi et al.        | prospective case series    | 3         | 2             | 3                                         | 8                   |
| Frère et al.          | retrospective cohort       | 4         | 2             | 2                                         | 8                   |
| Fuest et al.          | prospective cohort         | 4         | 2             | 3                                         | 9                   |
| Gismondi et al.       | prospective cohort         | 4         | 2             | 3                                         | 9                   |
| Goktas et al.         | prospective cohort         | 4         | 2             | 3                                         | 9                   |
| Guler et al.          | clinical trial             | 4         | 2             | 3                                         | 9                   |
| Hohn et al.           | prospective cohort         | 4         | 2             | 3                                         | 9                   |
| Hollands et al.       | prospective cohort         | 4         | 2             | 3                                         | 9                   |
| Horsley et al.        | retrospective cohort       | 4         | 2             | 3                                         | 9                   |
| Hwang et al.          | retrospective case-control | 3         | 2             | 3                                         | 8                   |
| Jaffar et al.         | prospective cohort         | 4         | 2             | 3                                         | 9                   |
| Jo et al.             | prospective cohort         | 4         | 2             | 3                                         | 9                   |
| Kaldirim et al.       | retrospective cohort       | 4         | 2             | 2                                         | 8                   |
| Karakurt et al.       | retrospective cohort       | 4         | 2             | 3                                         | 9                   |

|                            |                          |   |   |   |   |
|----------------------------|--------------------------|---|---|---|---|
| Kernt et al.               | case series              | 3 | 2 | 2 | 7 |
| Kim, D et al.              | retrospective cohort     | 4 | 2 | 3 | 9 |
| Kim, GN et al.             | clinical trial           | 3 | 2 | 3 | 8 |
| Kim, JY et al.             | retrospective cohort     | 4 | 2 | 3 | 9 |
| Lee, JW et al.             | prospective cohort       | 4 | 2 | 3 | 9 |
| Lee, K et al.              | clinical trial           | 4 | 2 | 3 | 9 |
| Lemos et al.               | prospective cohort       | 4 | 2 | 3 | 9 |
| Lemos-Reis et al.          | prospective cohort       | 4 | 2 | 3 | 9 |
| Lim et al.                 | prospective cohort       | 4 | 2 | 3 | 9 |
| Marey et al.               | prospective cohort       | 4 | 2 | 3 | 9 |
| Martinez-de-la-Casa et al. | prospective cohort       | 4 | 2 | 3 | 9 |
| Mazzarella et al.          | retrospective cohort     | 3 | 2 | 3 | 8 |
| Mazzulla et al.            | retrospective cohort     | 3 | 1 | 2 | 6 |
| Nalcaci et al.             | retrospective cohort     | 4 | 2 | 3 | 9 |
| Omay et al.                | prospective cohort       | 4 | 2 | 3 | 9 |
| Özata et al.               | retrospective cohort     | 4 | 2 | 3 | 9 |
| Ozkan et al.               | retrospective cohort     | 4 | 2 | 3 | 9 |
| Park et al.                | prospective cohort       | 4 | 2 | 3 | 9 |
| Parlak et al.              | prospective cohort       | 4 | 2 | 3 | 9 |
| Pohlmann et al.            | prospective cohort       | 4 | 2 | 3 | 9 |
| Rebolleda et al.           | prospective cohort       | 4 | 2 | 3 | 9 |
| Rensch et al.              | clinical trial           | 4 | 2 | 3 | 9 |
| Ryder et al.               | retrospective cohort     | 3 | 1 | 2 | 6 |
| Saatci et al.              | retrospective cohort     | 4 | 2 | 2 | 8 |
| Sengul et al.              | prospective cohort       | 4 | 2 | 3 | 9 |
| Shin et al.                | retrospective cohort     | 4 | 2 | 3 | 9 |
| Sobaci et al.              | retrospective cohort     | 4 | 2 | 3 | 9 |
| Song JH et al.             | retrospective cohort     | 4 | 2 | 3 | 9 |
| Song, S et al.             | prospective case control | 4 | 2 | 3 | 9 |
| Tas et al.                 | retrospective cohort     | 4 | 2 | 3 | 9 |
| Totan et al.               | prospective cohort       | 4 | 2 | 3 | 9 |
| Tsai et al.                | retrospective cohort     | 4 | 2 | 3 | 9 |
| Unsal et al.               | retrospective cohort     | 4 | 2 | 3 | 9 |
| Yilmaz et al.              | prospective cohort       | 4 | 2 | 2 | 8 |
| Zarranz-Ventura et al.     | retrospective cohort     | 4 | 2 | 2 | 8 |

\* For each of the sections Selection, Comparability, and Outcome/Exposure, a maximum of 4, 2, and 3 points could be given, respectively. Thus, the maximum score was 9. A higher score means higher quality.

TABLE S3. Quality assessment of the included randomized studies according to the Cochrane Risk of Bias Tool for Randomized Controlled Trials\*

| Author             | Design | Random sequence generation | Allocation Concealment | Blinding of participants and personnel | Blinding of outcome assessment | Incomplete outcome data | Selective reporting | Other bias |
|--------------------|--------|----------------------------|------------------------|----------------------------------------|--------------------------------|-------------------------|---------------------|------------|
| Ali et al.         | RCT    | ?                          | ?                      | ?                                      | ?                              | +                       | +                   | ?          |
| Ding et al.        | RCT    | ?                          | ?                      | ?                                      | ?                              | +                       | +                   | +          |
| Falkenstein et al. | RCT    | -                          | ?                      | ?                                      | ?                              | +                       | +                   | ?          |
| Gado et al.        | RCT    | +                          | +                      | +                                      | ?                              | ?                       | +                   | +          |
| Gregori et al.     | RCT    | ?                          | ?                      | ?                                      | ?                              | +                       | +                   | +          |
| Higashiyama et al. | RCT    | +                          | +                      | +                                      | ?                              | +                       | +                   | +          |
| Mishra et al.      | RCT    | ?                          | ?                      | ?                                      | ?                              | +                       | +                   | +          |
| Murray et al.      | RCT    | +                          | +                      | +                                      | ?                              | -                       | +                   | +          |
| Özkaya et al.      | RCT    | -                          | ?                      | ?                                      | ?                              | +                       | +                   | +          |
| Ramezani et al.    | RCT    | +                          | -                      | ?                                      | ?                              | +                       | +                   | +          |
| Soheilian et al.   | RCT    | ?                          | ?                      | ?                                      | ?                              | +                       | +                   | +          |

\*RCT = randomized controlled trial

TABLE S4. Assessment of Certainty of Evidence using Grading of Recommendations, Assessment, Development, and Evaluation\*

| Certainty Assessment                                                  |                        |              |               |              |             |                  | Certainty        |
|-----------------------------------------------------------------------|------------------------|--------------|---------------|--------------|-------------|------------------|------------------|
| No. of Studies                                                        | Study Design           | Risk of Bias | Inconsistency | Indirectness | Imprecision | Publication bias |                  |
| Intravitreal injection of anti-VEGF and IOP                           |                        |              |               |              |             |                  |                  |
| 39                                                                    | Observational studies  | Not serious  | Not serious   | Not serious  | Not serious | Not serious      | ⊕⊕○○<br>low      |
| 7                                                                     | Interventional studies | Serious      | Not serious   | Not serious  | Not serious | Not serious      | ⊕⊕⊕○<br>moderate |
| Intravitreal injection of a dexamethasone implant and IOP             |                        |              |               |              |             |                  |                  |
| 24                                                                    | Observational studies  | Not serious  | Serious       | Not serious  | Not serious | Not serious      | ⊕○○○<br>very low |
| 3                                                                     | Interventional studies | Serious      | Serious       | Not serious  | Not serious | Not serious      | ⊕⊕○○<br>low      |
| Intravitreal injection of anti-VEGF or dexamethasone implant and RNFL |                        |              |               |              |             |                  |                  |
| 13                                                                    | Observational studies  | Not serious  | Not serious   | Not serious  | Not serious | Not serious      | ⊕⊕○○<br>low      |

\*GRADE Working Group grades of evidence: High quality: further research is very unlikely to change our confidence in the estimate of effect; Moderate quality: further research is likely to have an important impact on our confidence in the estimate of effect and may change the estimate; Low quality: further research is very likely to have an important impact on our confidence in the estimate of effect and is likely to change the estimate; Very low quality: we are very uncertain about the estimate

FIGURE S1. Weighted mean difference in intraocular pressure during follow-up after bevacizumab intravitreal injection

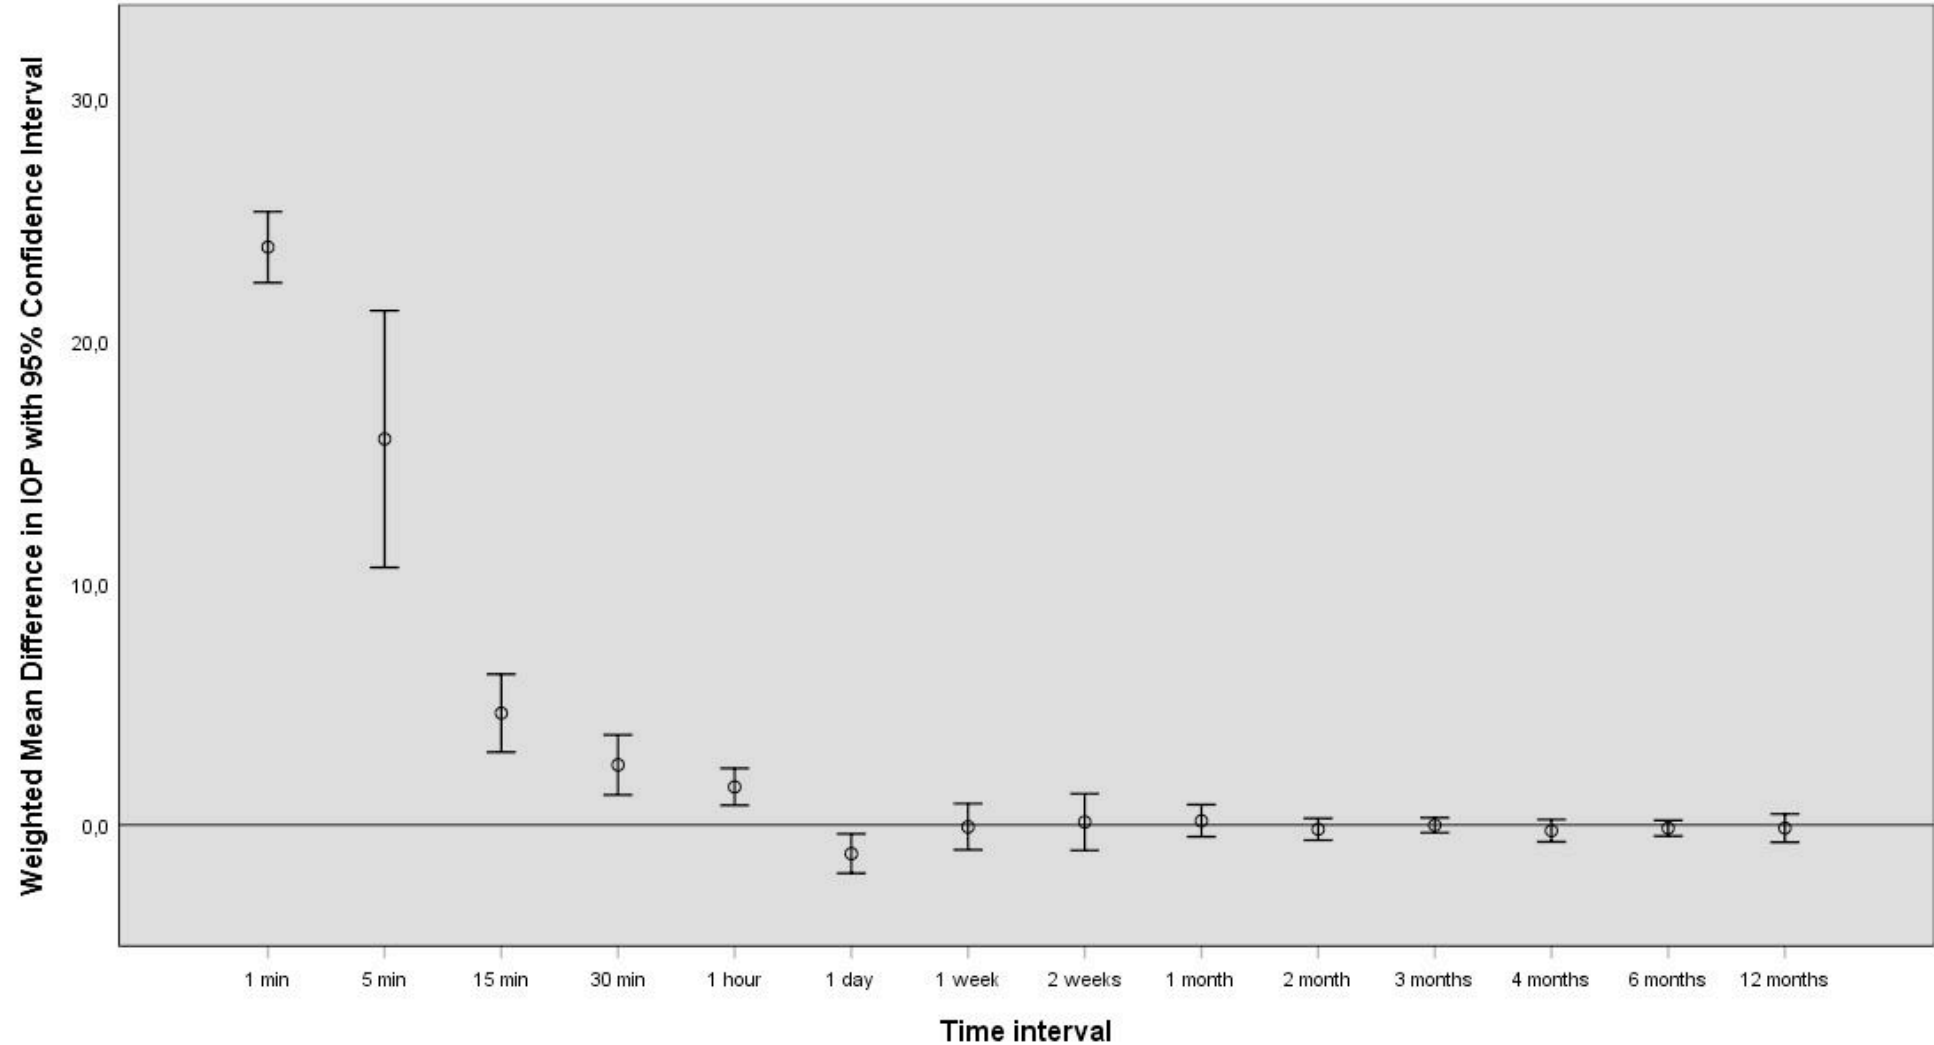

IOP = intraocular pressure

FIGURE S2. Meta-analyses for the association of bevacizumab and IOP.

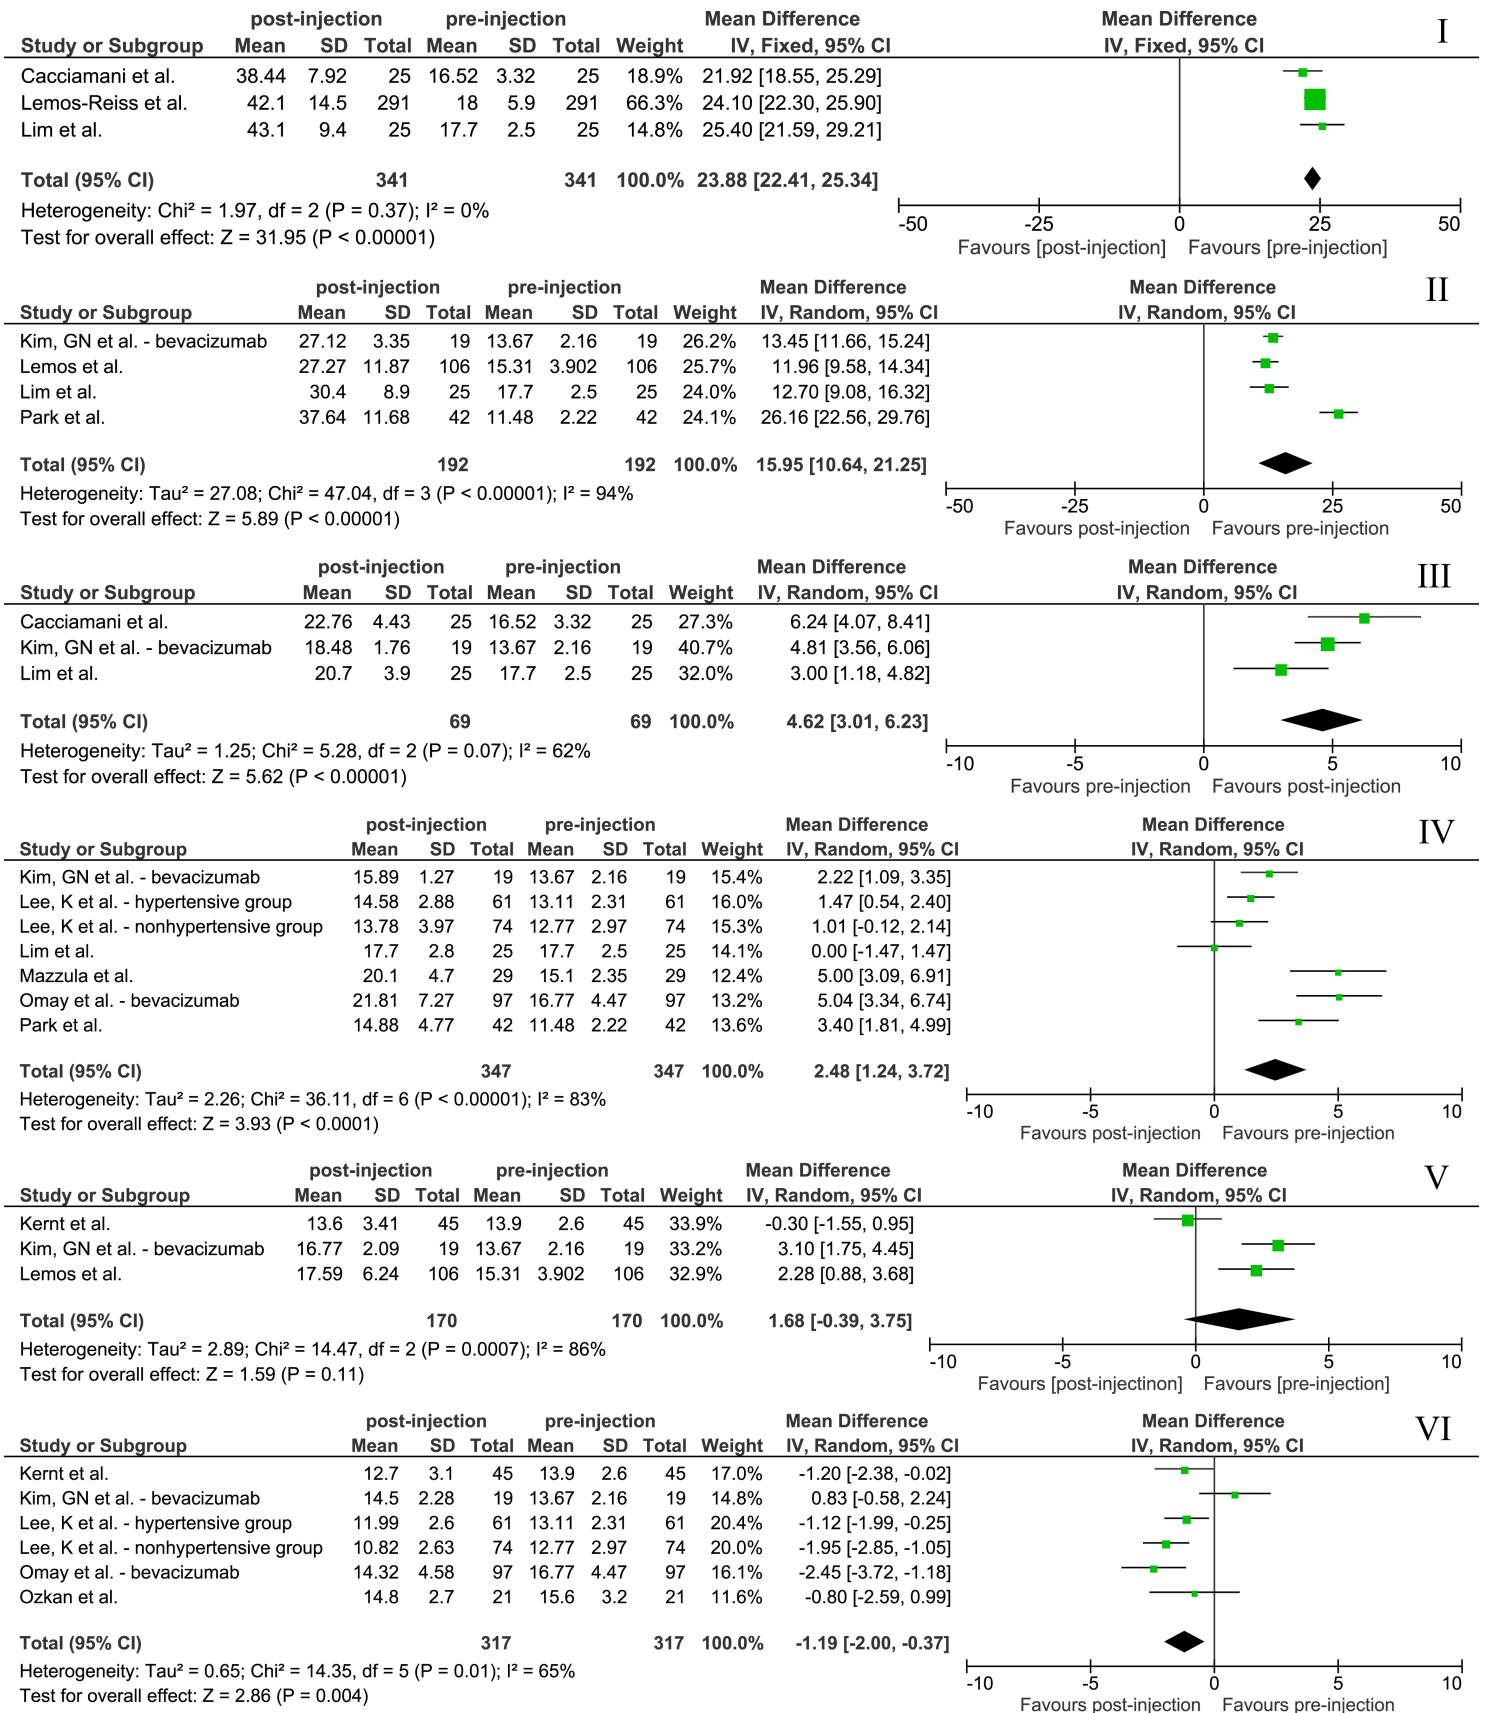



| Study or Subgroup                     | post-injection |      |       | pre-injection |      |       | Weight | Mean Difference<br>IV, Random, 95% CI |
|---------------------------------------|----------------|------|-------|---------------|------|-------|--------|---------------------------------------|
|                                       | Mean           | SD   | Total | Mean          | SD   | Total |        |                                       |
| Faghihi et al.                        | 16.4           | 4.1  | 64    | 15.7          | 2.9  | 64    | 12.9%  | 0.70 [-0.53, 1.93]                    |
| Kim, GN et al. - bevacizumab          | 15.36          | 1.85 | 19    | 13.67         | 2.16 | 19    | 12.7%  | 1.69 [0.41, 2.97]                     |
| Kim, JY et al.                        | 12.5           | 2.63 | 22    | 13.09         | 2.07 | 22    | 12.2%  | -0.59 [-1.99, 0.81]                   |
| Lee, K et al. - hypertensive group    | 12.16          | 2.31 | 61    | 13.11         | 2.31 | 61    | 14.7%  | -0.95 [-1.77, -0.13]                  |
| Lee, K et al. - nonhypertensive group | 11.71          | 2.47 | 74    | 12.77         | 2.97 | 74    | 14.4%  | -1.06 [-1.94, -0.18]                  |
| Omay et al. - bevacizumab             | 14.49          | 4.31 | 97    | 16.77         | 4.47 | 97    | 12.9%  | -2.28 [-3.52, -1.04]                  |
| Ozkan et al.                          | 16.4           | 3.3  | 21    | 15.6          | 3.2  | 21    | 9.7%   | 0.80 [-1.17, 2.77]                    |
| Totan et al.                          | 18.4           | 3.7  | 30    | 16.5          | 3.3  | 30    | 10.5%  | 1.90 [0.13, 3.67]                     |

Total (95% CI) 388 388 100.0% -0.08 [-1.03, 0.88]

Heterogeneity: Tau<sup>2</sup> = 1.46; Chi<sup>2</sup> = 34.07, df = 7 (P < 0.0001); I<sup>2</sup> = 79%

Test for overall effect: Z = 0.15 (P = 0.88)

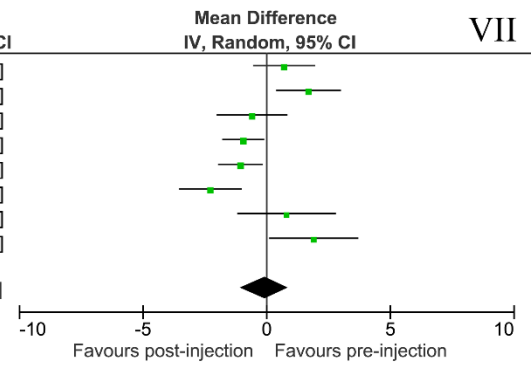

| Study or Subgroup | post-injection |      |       | pre-injection |       |       | Weight | Mean Difference<br>IV, Random, 95% CI |
|-------------------|----------------|------|-------|---------------|-------|-------|--------|---------------------------------------|
|                   | Mean           | SD   | Total | Mean          | SD    | Total |        |                                       |
| Ding et al.       | 13.2           | 2.87 | 16    | 12.2          | 2     | 16    | 17.5%  | 1.00 [-0.71, 2.71]                    |
| Guler et al.      | 14.29          | 3.91 | 43    | 14.32         | 4.25  | 43    | 17.4%  | -0.03 [-1.76, 1.70]                   |
| Kernt et al.      | 12.7           | 3    | 45    | 13.9          | 2.6   | 45    | 21.9%  | -1.20 [-2.36, -0.04]                  |
| Lemos et al.      | 16.86          | 3.62 | 106   | 15.31         | 3.902 | 106   | 23.1%  | 1.55 [0.54, 2.56]                     |
| Song, J.H. et al. | 15.4           | 2.75 | 38    | 16.1          | 3.34  | 38    | 20.2%  | -0.70 [-2.08, 0.68]                   |

Total (95% CI) 248 248 100.0% 0.12 [-1.05, 1.29]

Heterogeneity: Tau<sup>2</sup> = 1.28; Chi<sup>2</sup> = 14.96, df = 4 (P = 0.005); I<sup>2</sup> = 73%

Test for overall effect: Z = 0.21 (P = 0.84)

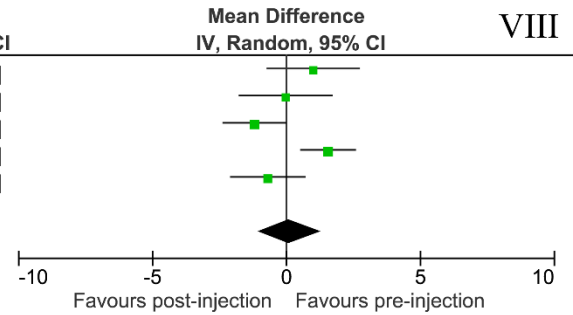

| Study or Subgroup            | post-injection |       |       | pre-injection |       |       | Weight | Mean Difference<br>IV, Random, 95% CI |
|------------------------------|----------------|-------|-------|---------------|-------|-------|--------|---------------------------------------|
|                              | Mean           | SD    | Total | Mean          | SD    | Total |        |                                       |
| Ding et al.                  | 13.22          | 2.94  | 16    | 12.2          | 2     | 16    | 8.1%   | 1.02 [-0.72, 2.76]                    |
| Gado et al.                  | 17             | 1.598 | 30    | 17            | 1.839 | 30    | 14.0%  | 0.00 [-0.87, 0.87]                    |
| Guler et al.                 | 13.23          | 4.37  | 43    | 14.32         | 4.25  | 43    | 7.7%   | -1.09 [-2.91, 0.73]                   |
| Kim, GN et al. - bevacizumab | 14.86          | 2.73  | 19    | 13.67         | 2.16  | 19    | 9.1%   | 1.19 [-0.38, 2.76]                    |
| Kim, JY et al.               | 12.23          | 2.72  | 22    | 13.09         | 2.07  | 22    | 10.0%  | -0.86 [-2.29, 0.57]                   |
| Omay et al. - bevacizumab    | 15.19          | 4.68  | 97    | 16.77         | 4.47  | 97    | 10.9%  | -1.58 [-2.87, -0.29]                  |
| Ozkan et al.                 | 16.3           | 2.6   | 21    | 15.6          | 3.2   | 21    | 8.0%   | 0.70 [-1.06, 2.46]                    |
| Rensch et al.                | 14.5           | 3.2   | 25    | 14.2          | 3.2   | 25    | 8.0%   | 0.30 [-1.47, 2.07]                    |
| Song, J.H. et al.            | 16             | 2.86  | 38    | 16.1          | 3.34  | 38    | 10.2%  | -0.10 [-1.50, 1.30]                   |
| Totan et al.                 | 19.5           | 5.3   | 30    | 16.5          | 3.3   | 30    | 6.0%   | 3.00 [0.77, 5.23]                     |
| Tsai et al.                  | 15.3           | 3     | 23    | 14.4          | 3.1   | 23    | 8.0%   | 0.90 [-0.86, 2.66]                    |

Total (95% CI) 364 364 100.0% 0.17 [-0.49, 0.84]

Heterogeneity: Tau<sup>2</sup> = 0.62; Chi<sup>2</sup> = 20.69, df = 10 (P = 0.02); I<sup>2</sup> = 52%

Test for overall effect: Z = 0.50 (P = 0.61)

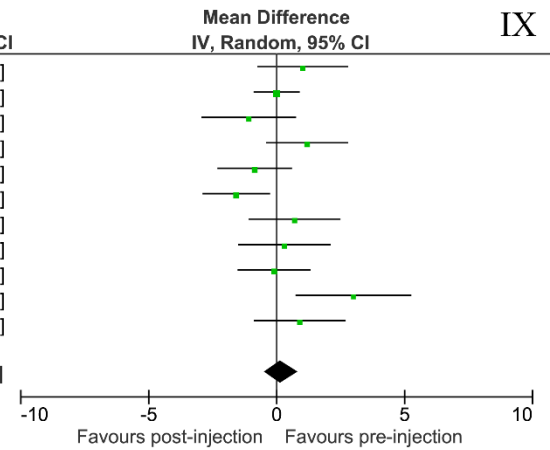

| Study or Subgroup                     | post-injection |       |       | pre-injection |       |       | Weight | Mean Difference<br>IV, Fixed, 95% CI |
|---------------------------------------|----------------|-------|-------|---------------|-------|-------|--------|--------------------------------------|
|                                       | Mean           | SD    | Total | Mean          | SD    | Total |        |                                      |
| Gado et al.                           | 17             | 1.598 | 30    | 17            | 1.839 | 30    | 26.3%  | 0.00 [-0.87, 0.87]                   |
| Kim, JY et al.                        | 12.55          | 2.09  | 22    | 13.09         | 2.07  | 22    | 13.2%  | -0.54 [-1.77, 0.69]                  |
| Lee, K et al. - hypertensive group    | 12.75          | 2.51  | 61    | 13.11         | 2.31  | 61    | 27.2%  | -0.36 [-1.22, 0.50]                  |
| Lee, K et al. - nonhypertensive group | 12.55          | 3.09  | 74    | 12.77         | 2.97  | 74    | 20.9%  | -0.22 [-1.20, 0.76]                  |
| Song, J.H. et al.                     | 16.4           | 2.2   | 38    | 16.1          | 3.34  | 38    | 12.3%  | 0.30 [-0.97, 1.57]                   |

Total (95% CI) 225 225 100.0% -0.18 [-0.63, 0.27]

Heterogeneity: Chi<sup>2</sup> = 1.22, df = 4 (P = 0.88); I<sup>2</sup> = 0%

Test for overall effect: Z = 0.78 (P = 0.43)

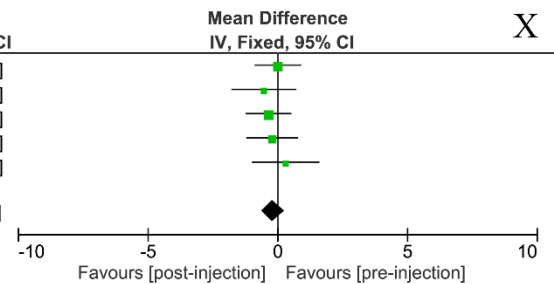

| Study or Subgroup                     | post-injection |       |       | pre-injection |       |       | Weight | Mean Difference<br>IV, Fixed, 95% CI |
|---------------------------------------|----------------|-------|-------|---------------|-------|-------|--------|--------------------------------------|
|                                       | Mean           | SD    | Total | Mean          | SD    | Total |        |                                      |
| Ding et al.                           | 13.62          | 2.91  | 16    | 12.2          | 2     | 16    | 3.2%   | 1.42 [-0.31, 3.15]                   |
| Gado et al.                           | 16             | 1.343 | 30    | 17            | 1.839 | 30    | 14.4%  | -1.00 [-1.81, -0.19]                 |
| Kernt et al.                          | 14.7           | 2.9   | 45    | 13.9          | 2.6   | 45    | 7.4%   | 0.80 [-0.34, 1.94]                   |
| Kim, JY et al.                        | 12             | 2.78  | 22    | 13.09         | 2.07  | 22    | 4.6%   | -1.09 [-2.54, 0.36]                  |
| Lee, K et al. - hypertensive group    | 13.1           | 2.4   | 61    | 13.11         | 2.31  | 61    | 13.7%  | -0.01 [-0.85, 0.83]                  |
| Lee, K et al. - nonhypertensive group | 12.79          | 3.4   | 74    | 12.77         | 2.97  | 74    | 9.0%   | 0.02 [-1.01, 1.05]                   |
| Maray et al.                          | 15.13          | 2.21  | 30    | 15.47         | 2.93  | 30    | 5.5%   | -0.34 [-1.65, 0.97]                  |
| Ozkan et al.                          | 15.3           | 2.8   | 21    | 15.6          | 3.2   | 21    | 2.9%   | -0.30 [-2.12, 1.52]                  |
| Ramezani et al.                       | 12.8           | 2     | 43    | 13.3          | 2.7   | 43    | 9.5%   | -0.50 [-1.50, 0.50]                  |
| Rensch et al.                         | 14.2           | 2.8   | 25    | 14.2          | 3.2   | 25    | 3.4%   | 0.00 [-1.67, 1.67]                   |
| Soheilian et al.                      | 14.7           | 1.6   | 44    | 14.2          | 2     | 44    | 16.7%  | 0.50 [-0.26, 1.26]                   |
| Tas et al.                            | 13.72          | 3.04  | 40    | 13.31         | 3.22  | 40    | 5.1%   | 0.41 [-0.96, 1.78]                   |
| Totan et al.                          | 18.5           | 4.8   | 30    | 16.5          | 3.3   | 30    | 2.2%   | 2.00 [-0.08, 4.08]                   |
| Tsai et al.                           | 14.7           | 3.6   | 23    | 14.4          | 3.1   | 23    | 2.5%   | 0.30 [-1.64, 2.24]                   |

Total (95% CI) 504 504 100.0% -0.01 [-0.32, 0.30]

Heterogeneity: Chi<sup>2</sup> = 19.41, df = 13 (P = 0.11); I<sup>2</sup> = 33%

Test for overall effect: Z = 0.05 (P = 0.96)

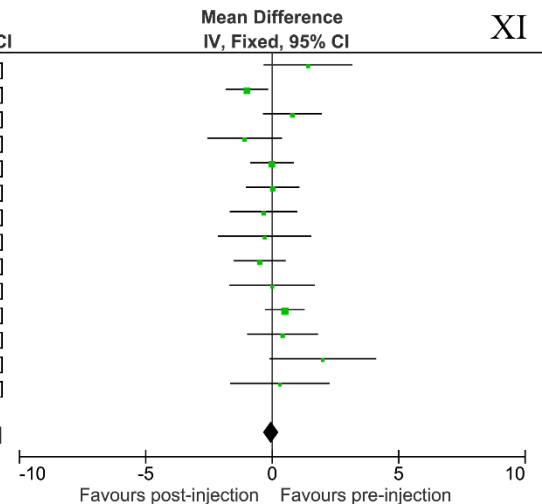

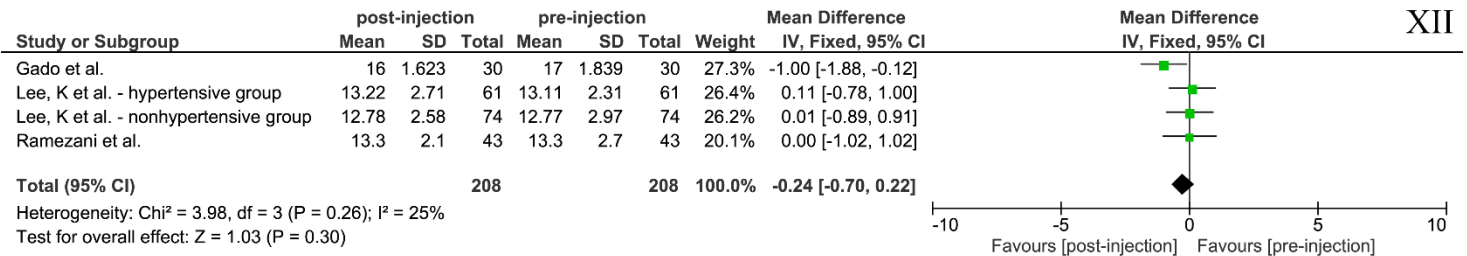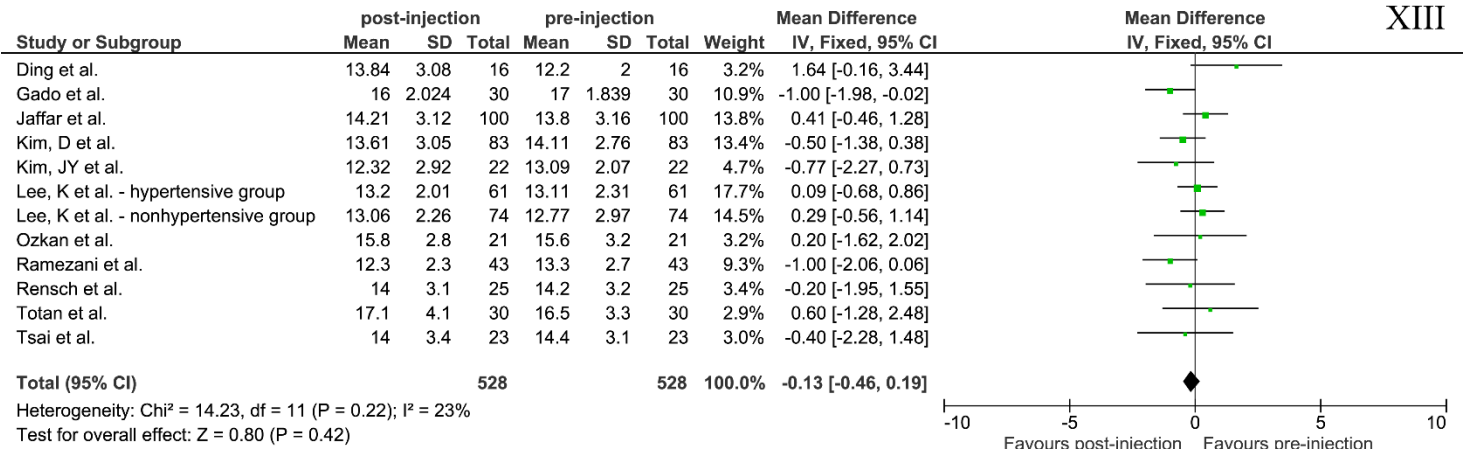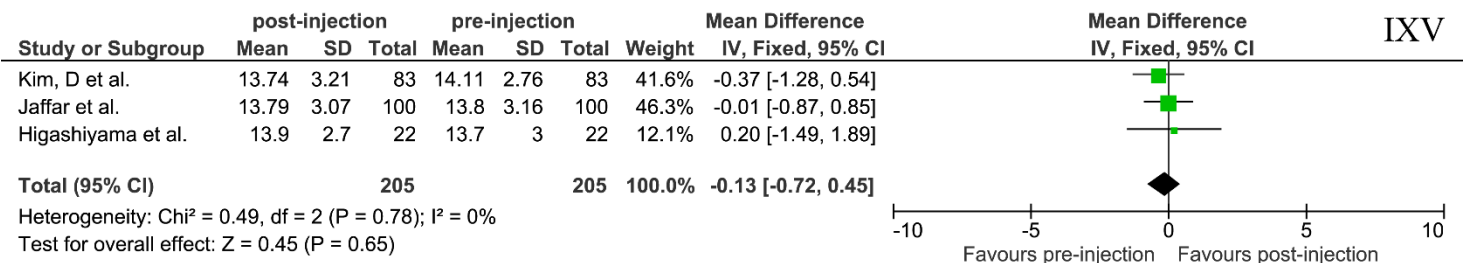

Black diamonds indicate the overall weighted mean difference (WMD). The size of the green box is inversely proportional to the variance. Horizontal lines indicate 95% CI. The vertical line in each panel shows the value for no effect (WMD = 0).

IOP = intra-ocular pressure; CI = confidence interval; SD = standard deviation; I = 1 minute or less after injection; II = 5 minutes; III = 15 minutes; IV = 30 minutes; V = 1 hour; VI = 1 day; VII = 1 week; VIII = 2 weeks; IX = 1 month; X = 2 months; XI = 3 months; XII = 4 months; XIII = 6 months; IXV = 12 months.

FIGURE S3. Weighted mean difference in intraocular pressure during follow-up after ranibizumab intravitreal injection

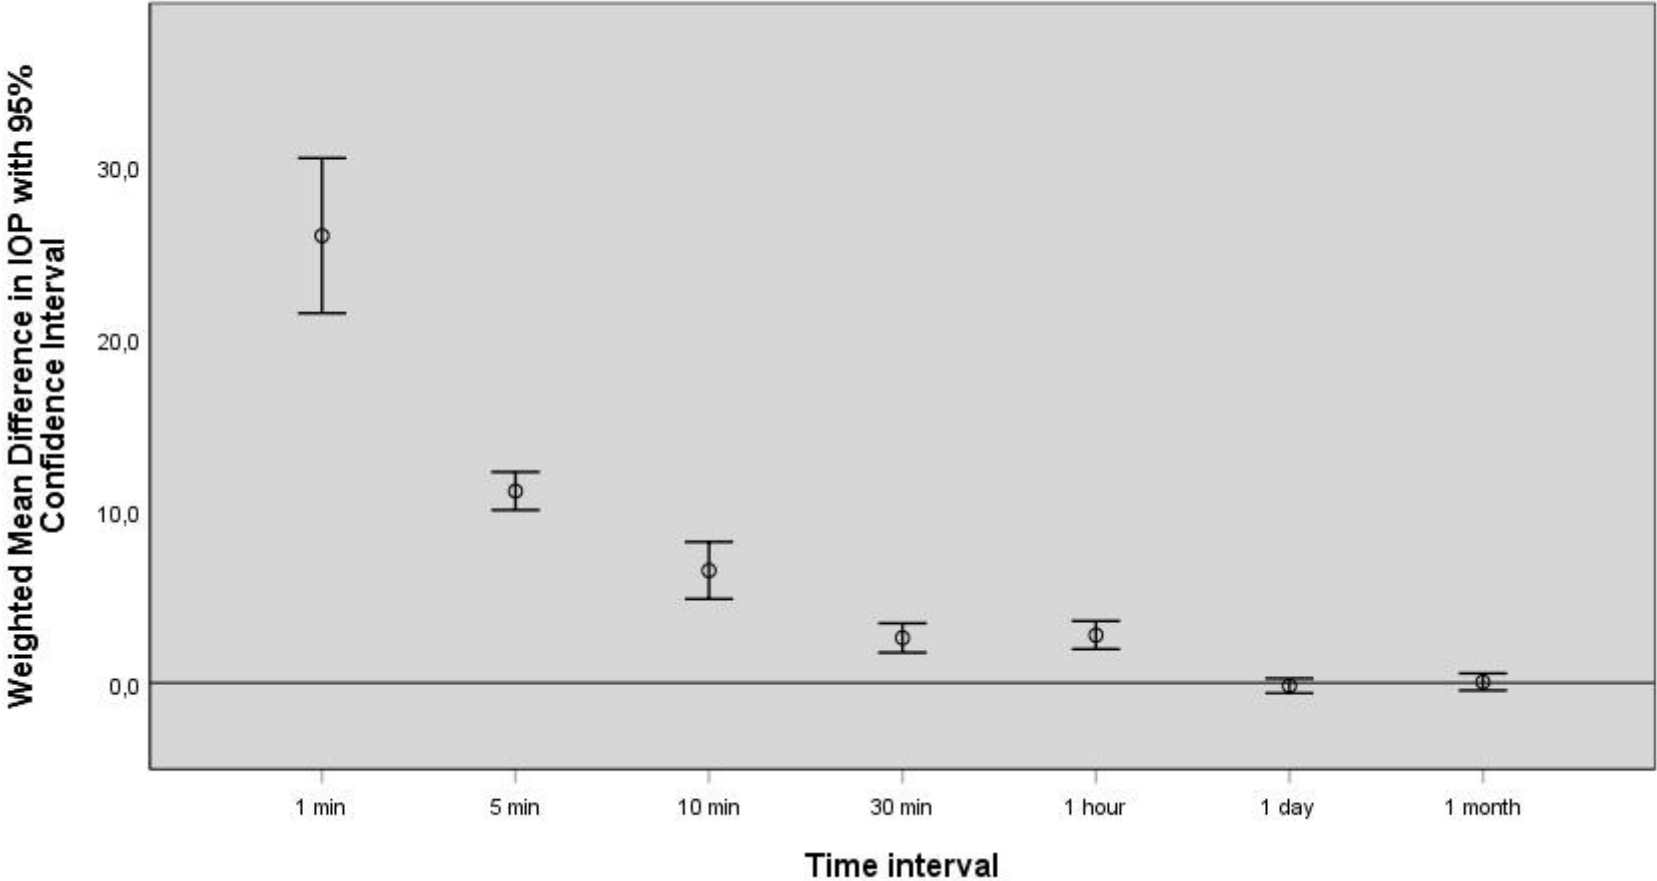

IOP = intraocular pressure

FIGURE S4. Meta-analyses for the association of ranibizumab and IOP.

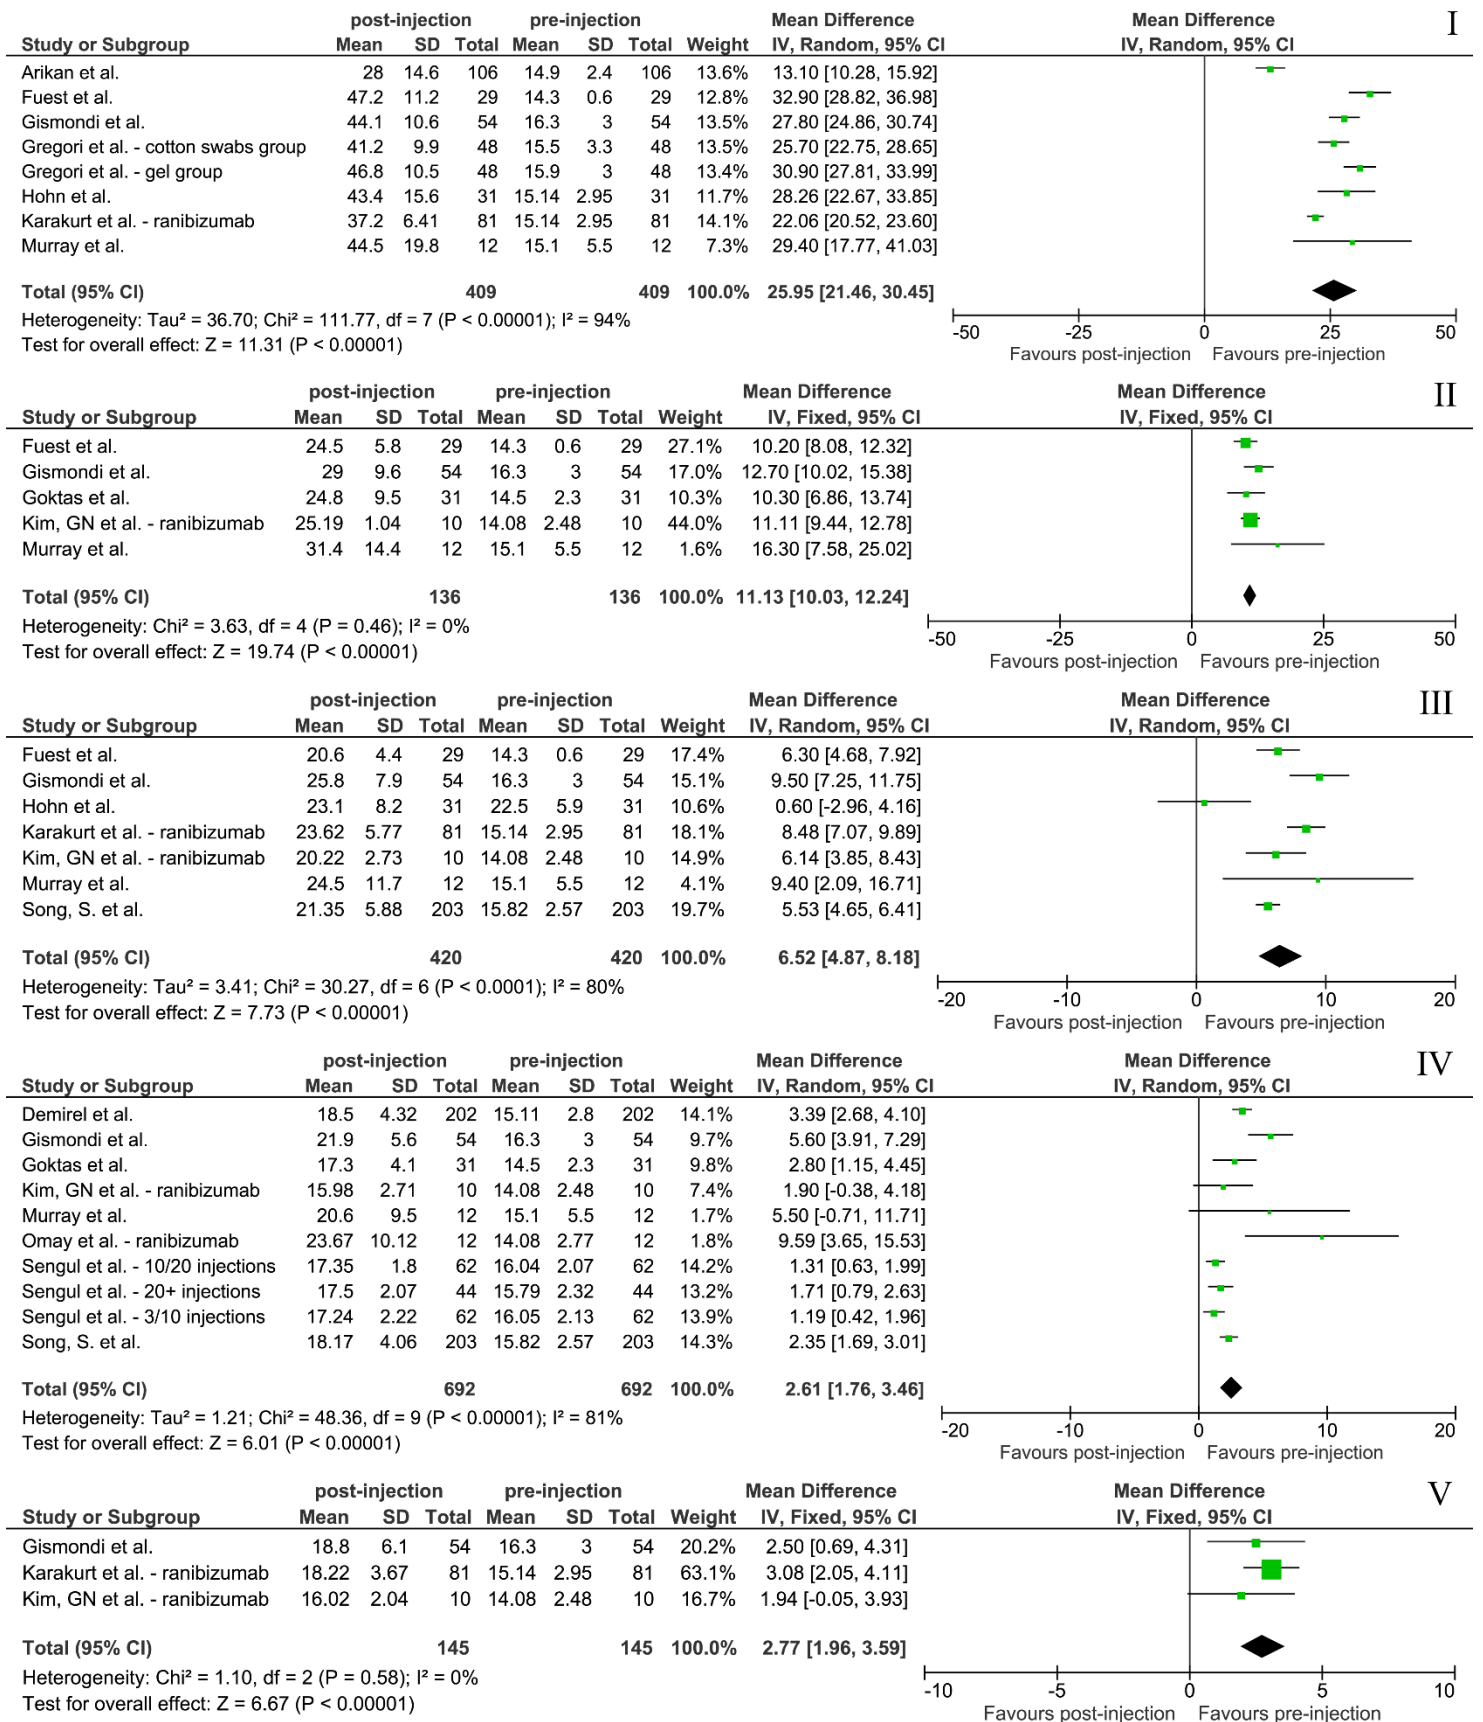

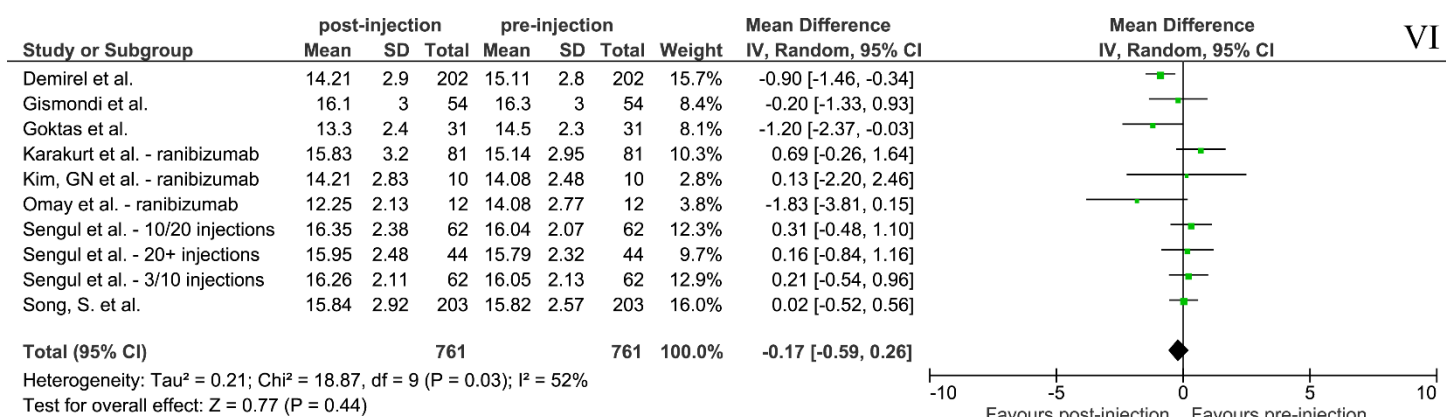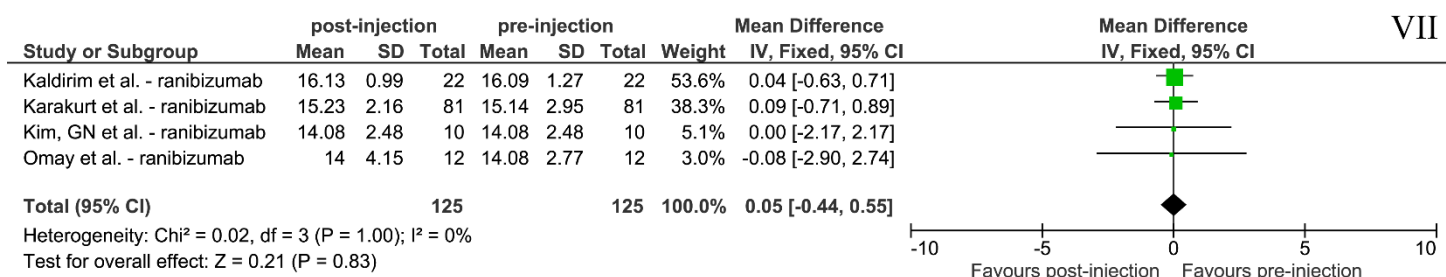

Black diamonds indicate the overall weighted mean difference (WMD). The size of the green box is inversely proportional to the variance. Horizontal lines indicate 95% CI. The vertical line in each panel shows the value for no effect (WMD = 0).

IOP = intraocular pressure; CI = confidence interval; SD = standard deviation; I = 1 minute after injection; II = 5 minutes; III = 10 minutes; IV = 30 minutes; V = 1 hour; VI = 1 day; VII = 1 month.

Figure S5. Meta-analyses for the association of anti-VEGF and IOP.

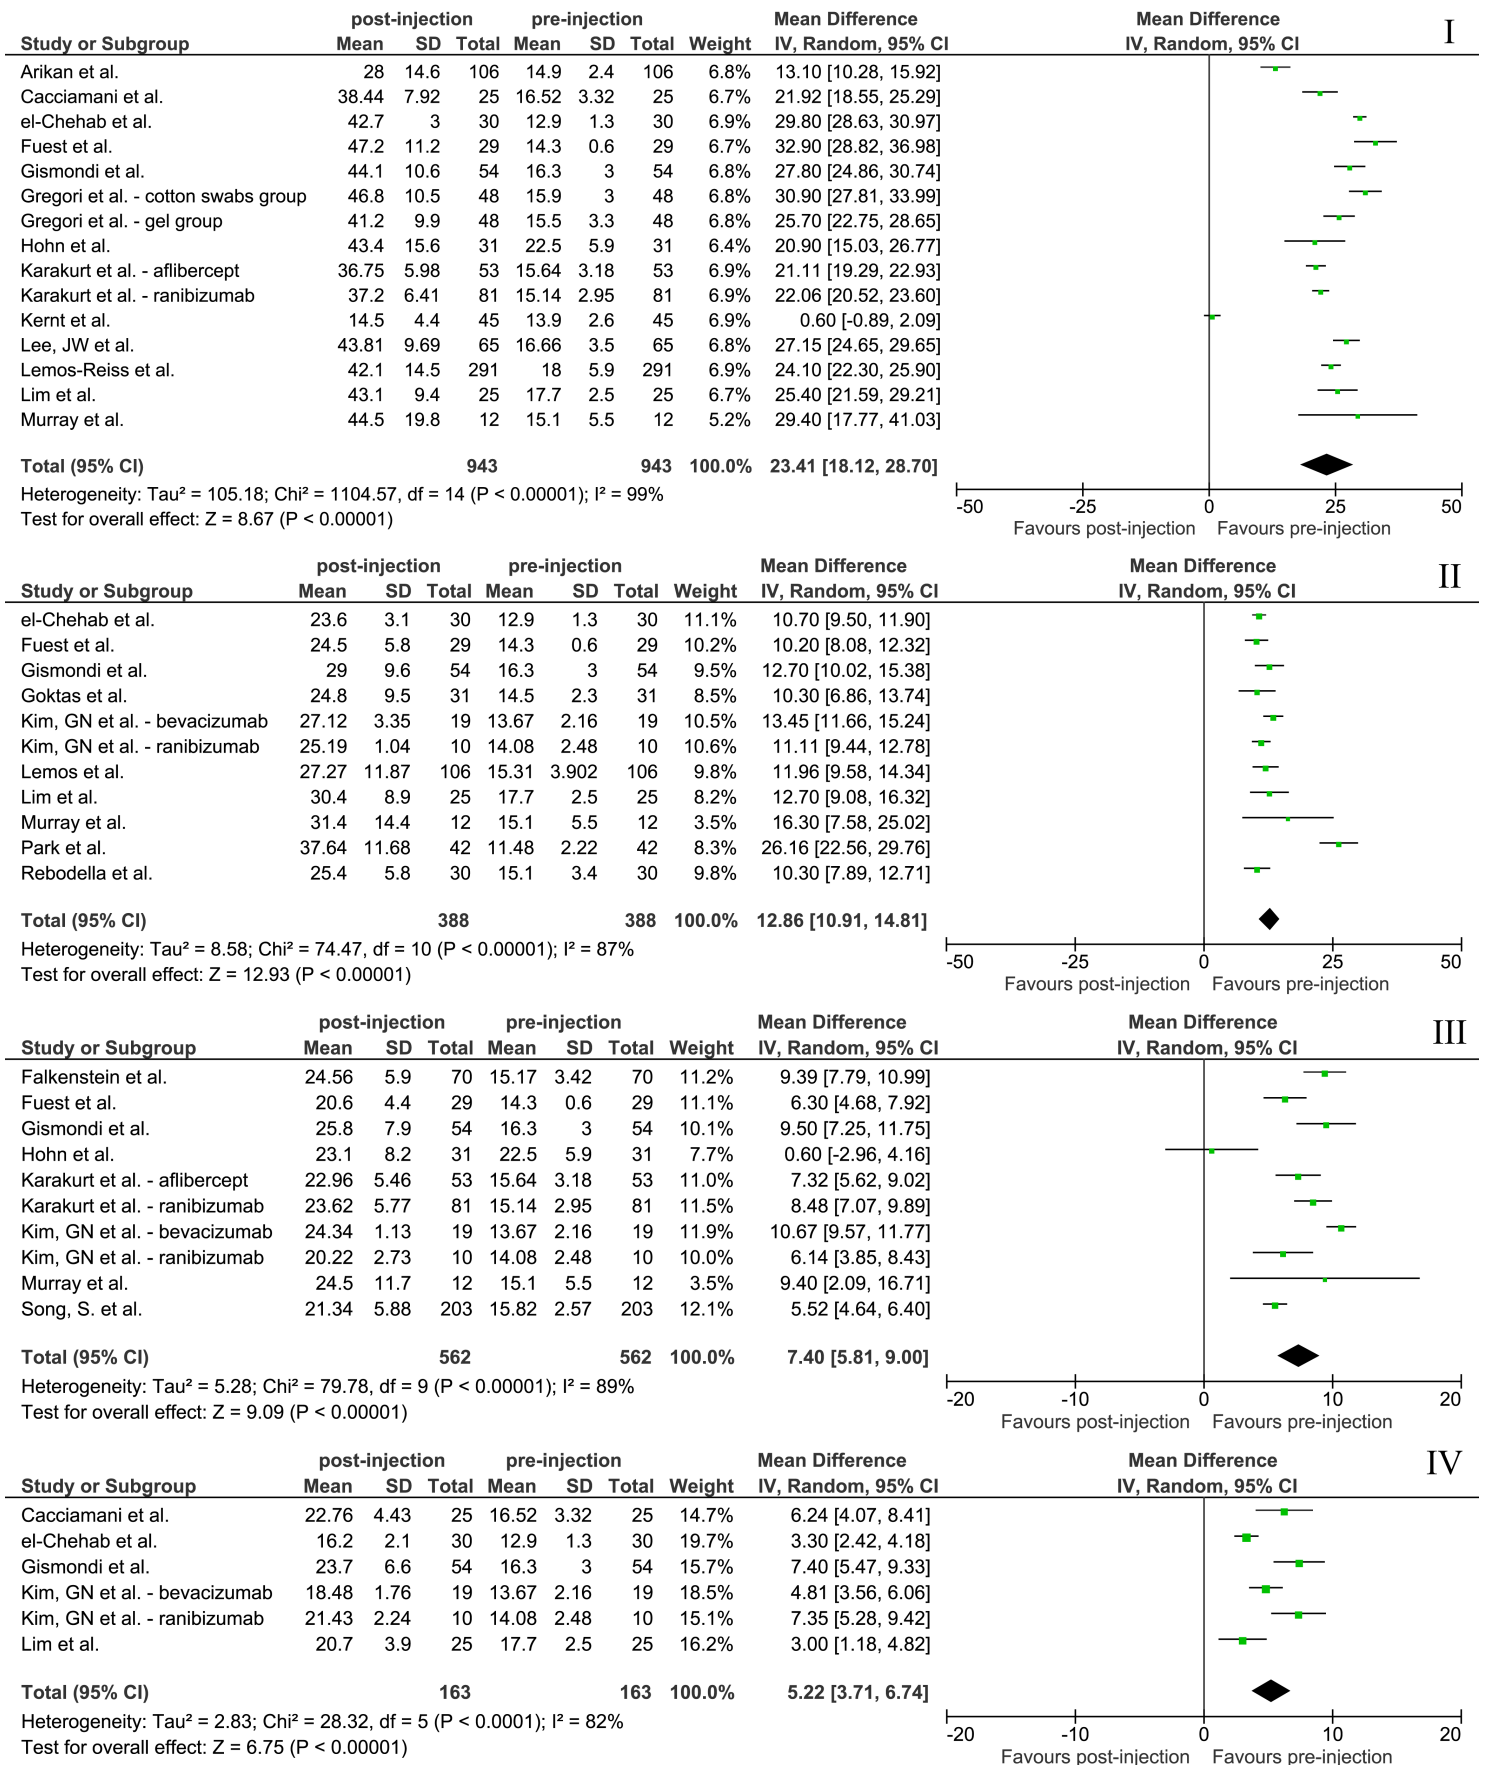



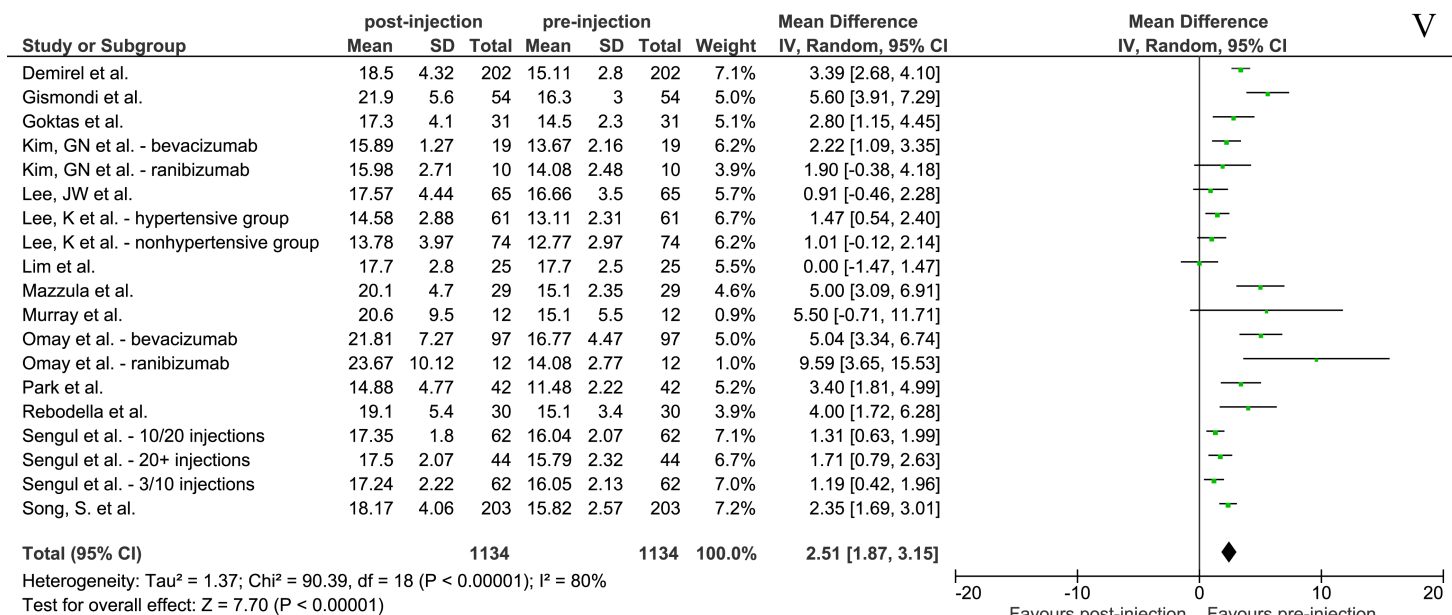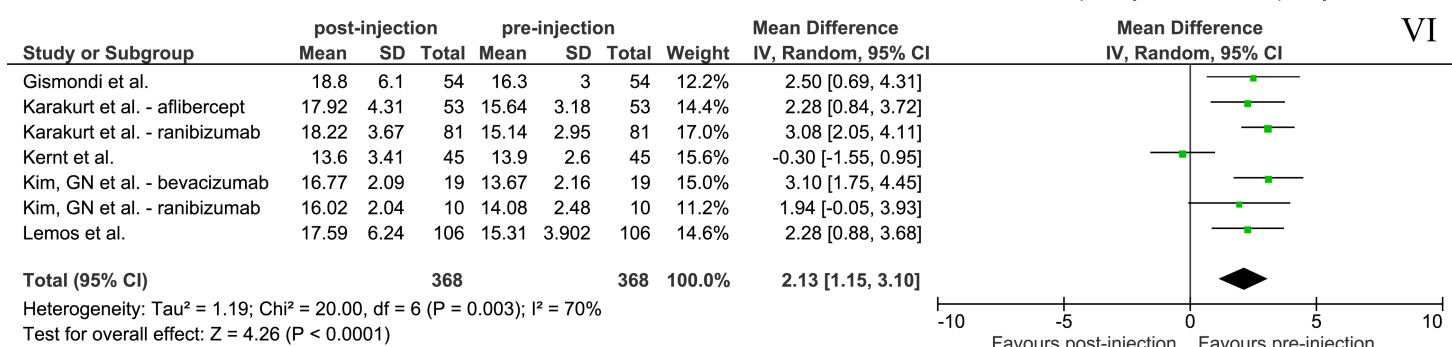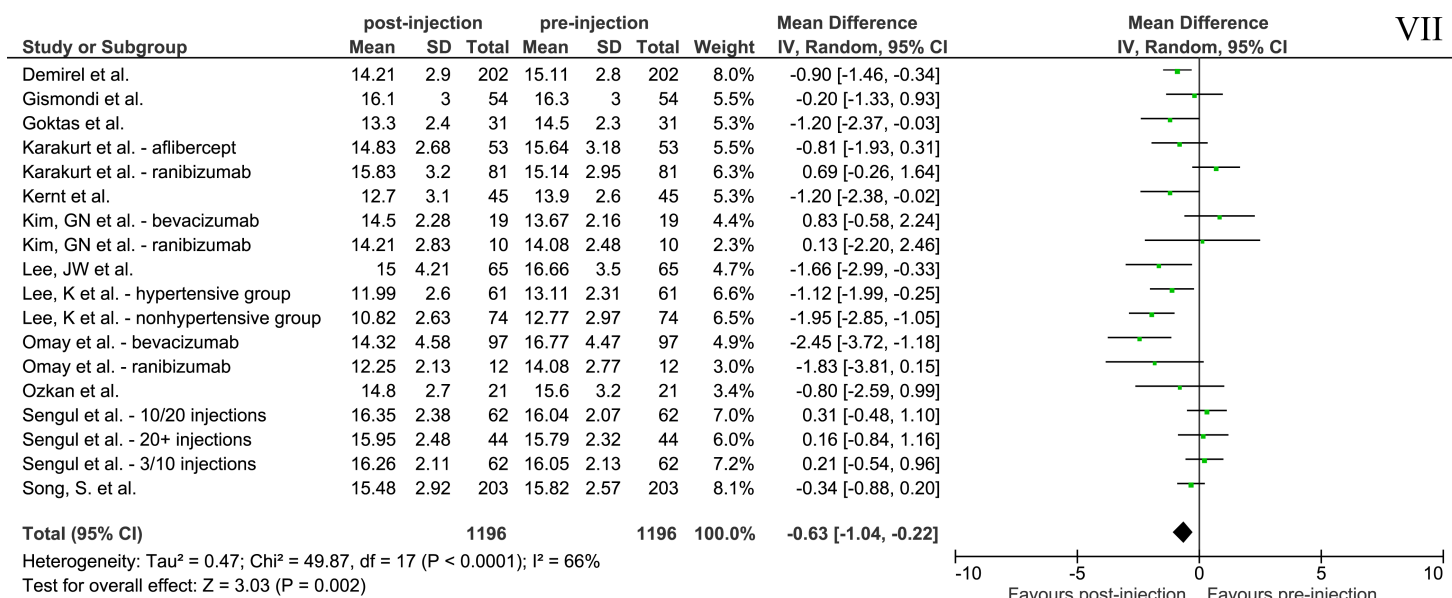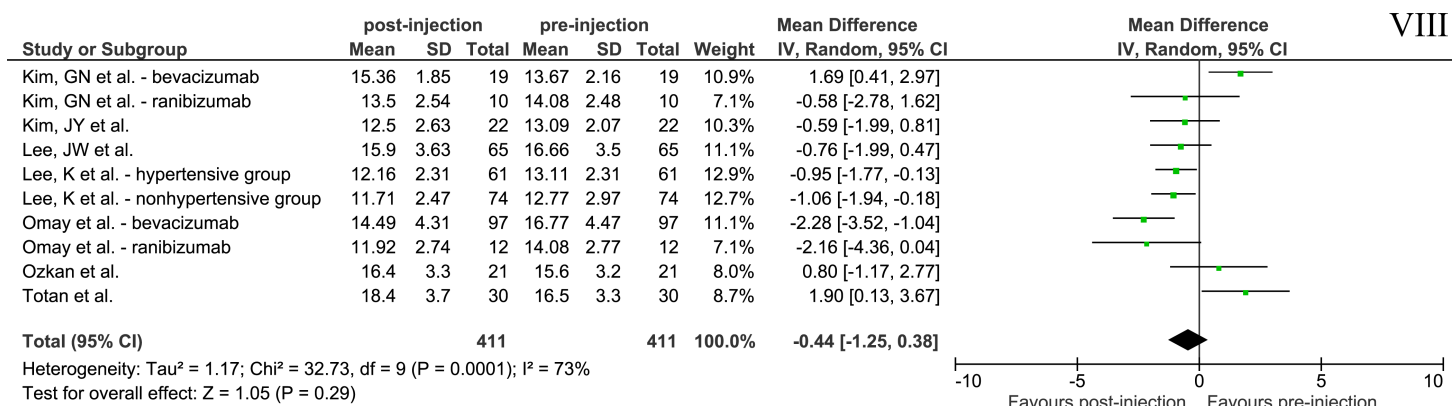

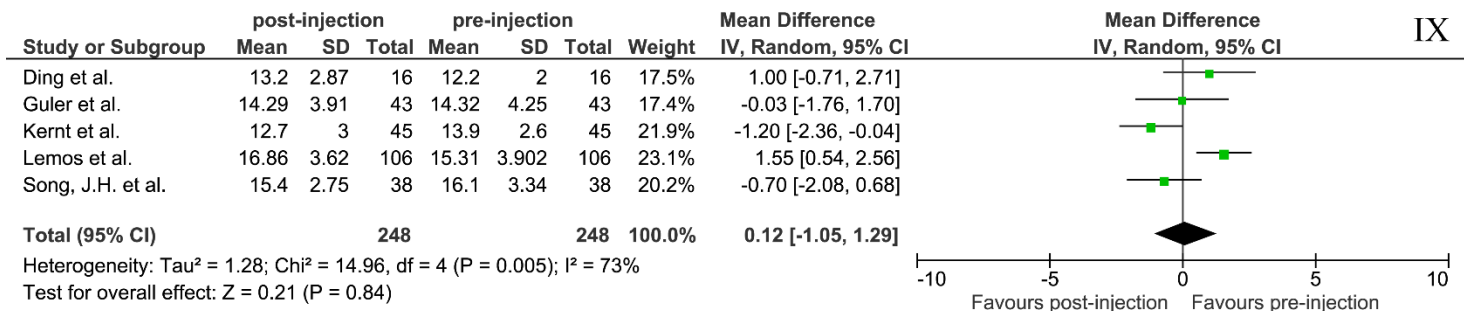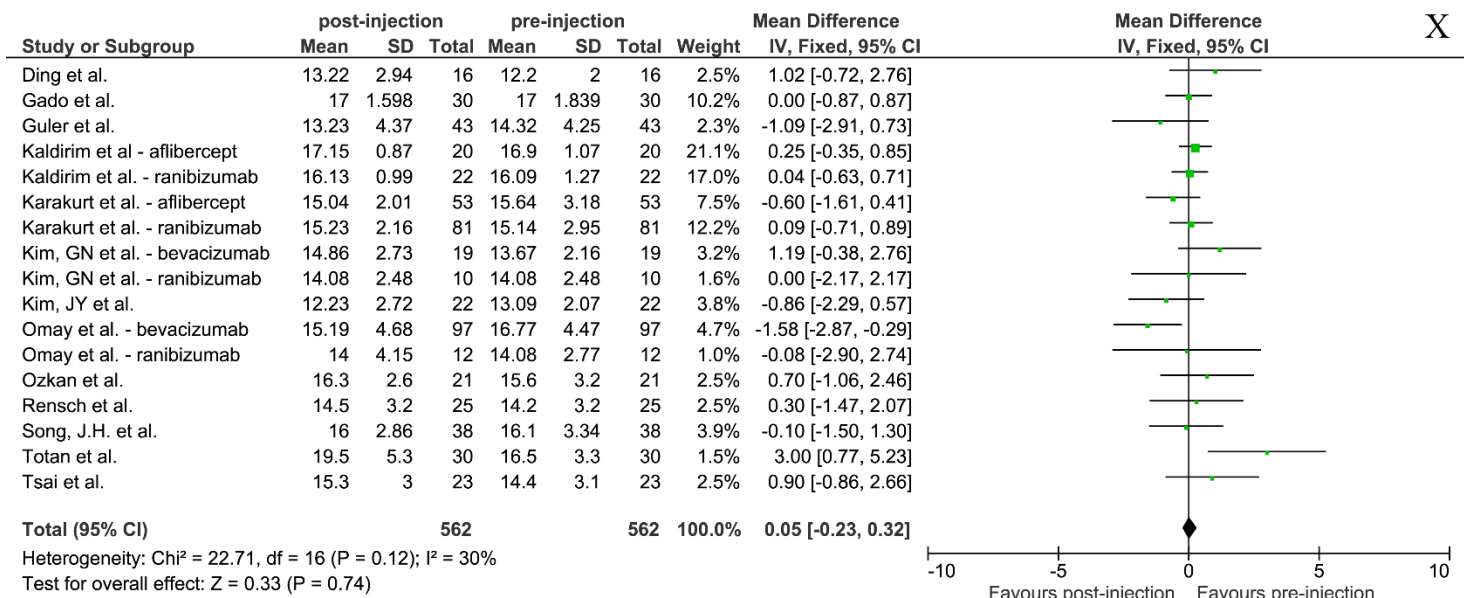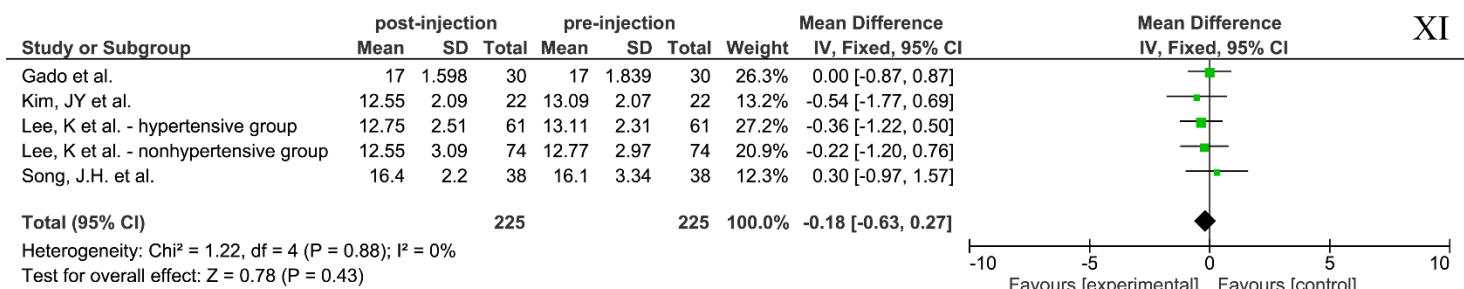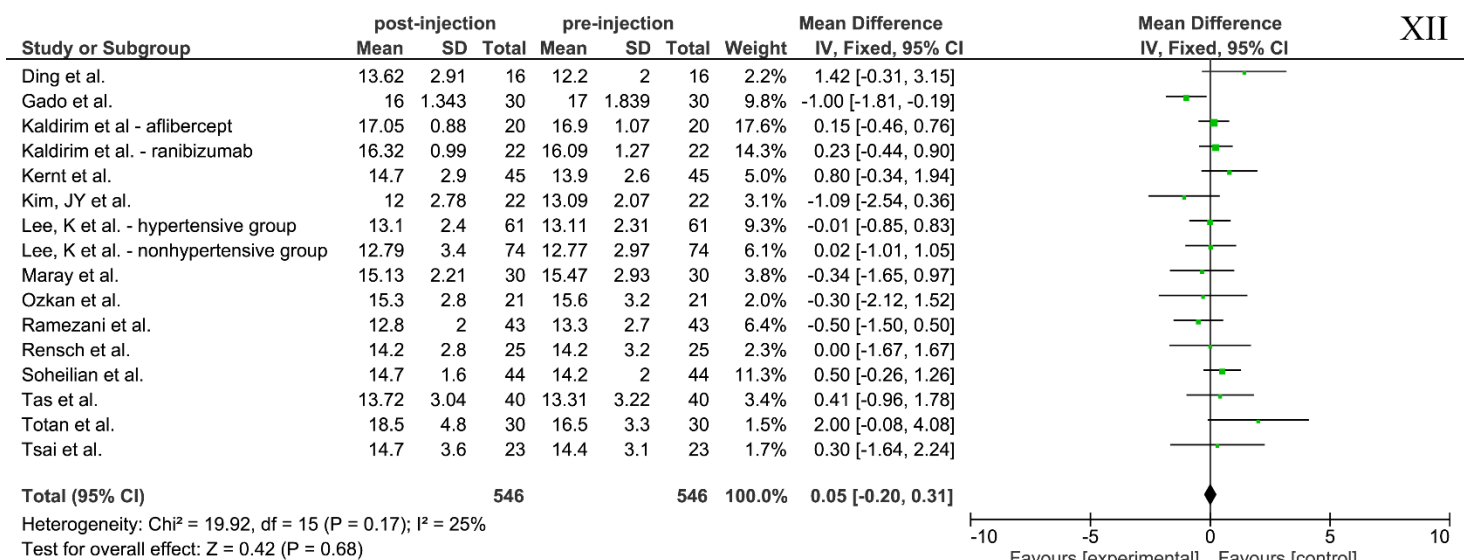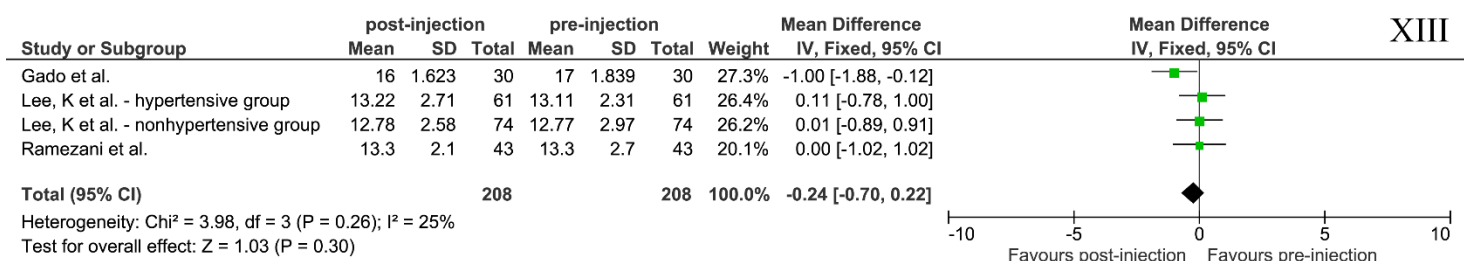



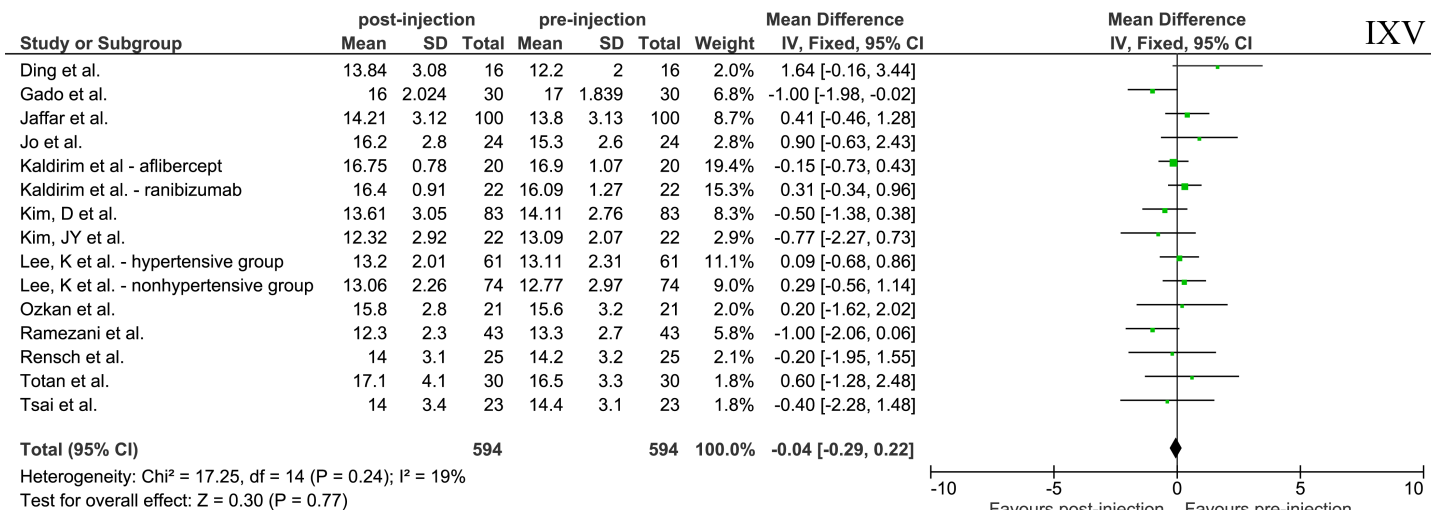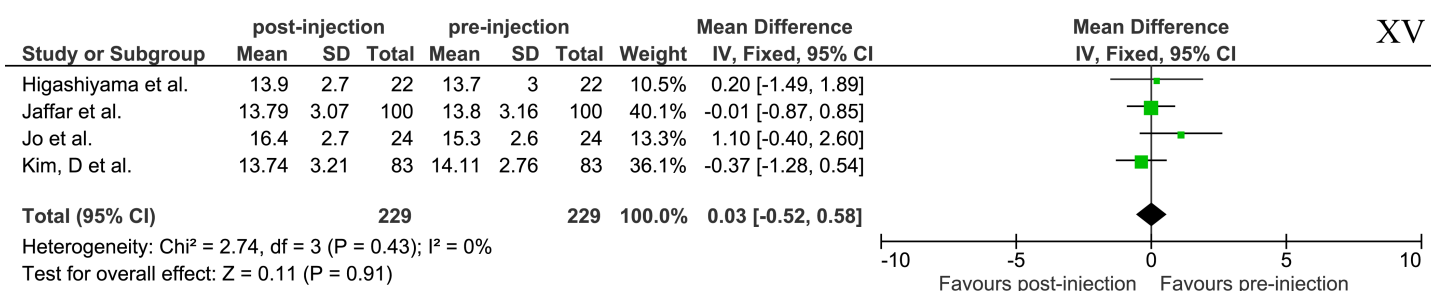

Black diamonds indicate the overall weighted mean difference (WMD). The size of the green box is inversely proportional to the variance. Horizontal lines indicate 95% CI. The vertical line in each panel shows the value for no effect (WMD = 0).

Anti-VEGF = anti vascular endothelial growth factor; IOP = intra-ocular pressure; CI = confidence interval; SD = standard deviation; I = 1 minute after injection; II = 5 minutes; III = 10 minutes; IV = 15 minutes; V = 30 minutes; VI = 1 hour; VII = 1 day; VIII = 1 week; IX = 2 weeks; X = 1 month; XI = 2 months; XII = 3 months; XIII = 4 months; IXV = 6 months; XV = 12 months.

FIGURE S6. Meta-analyses for the association of dexamethasone implant and IOP.

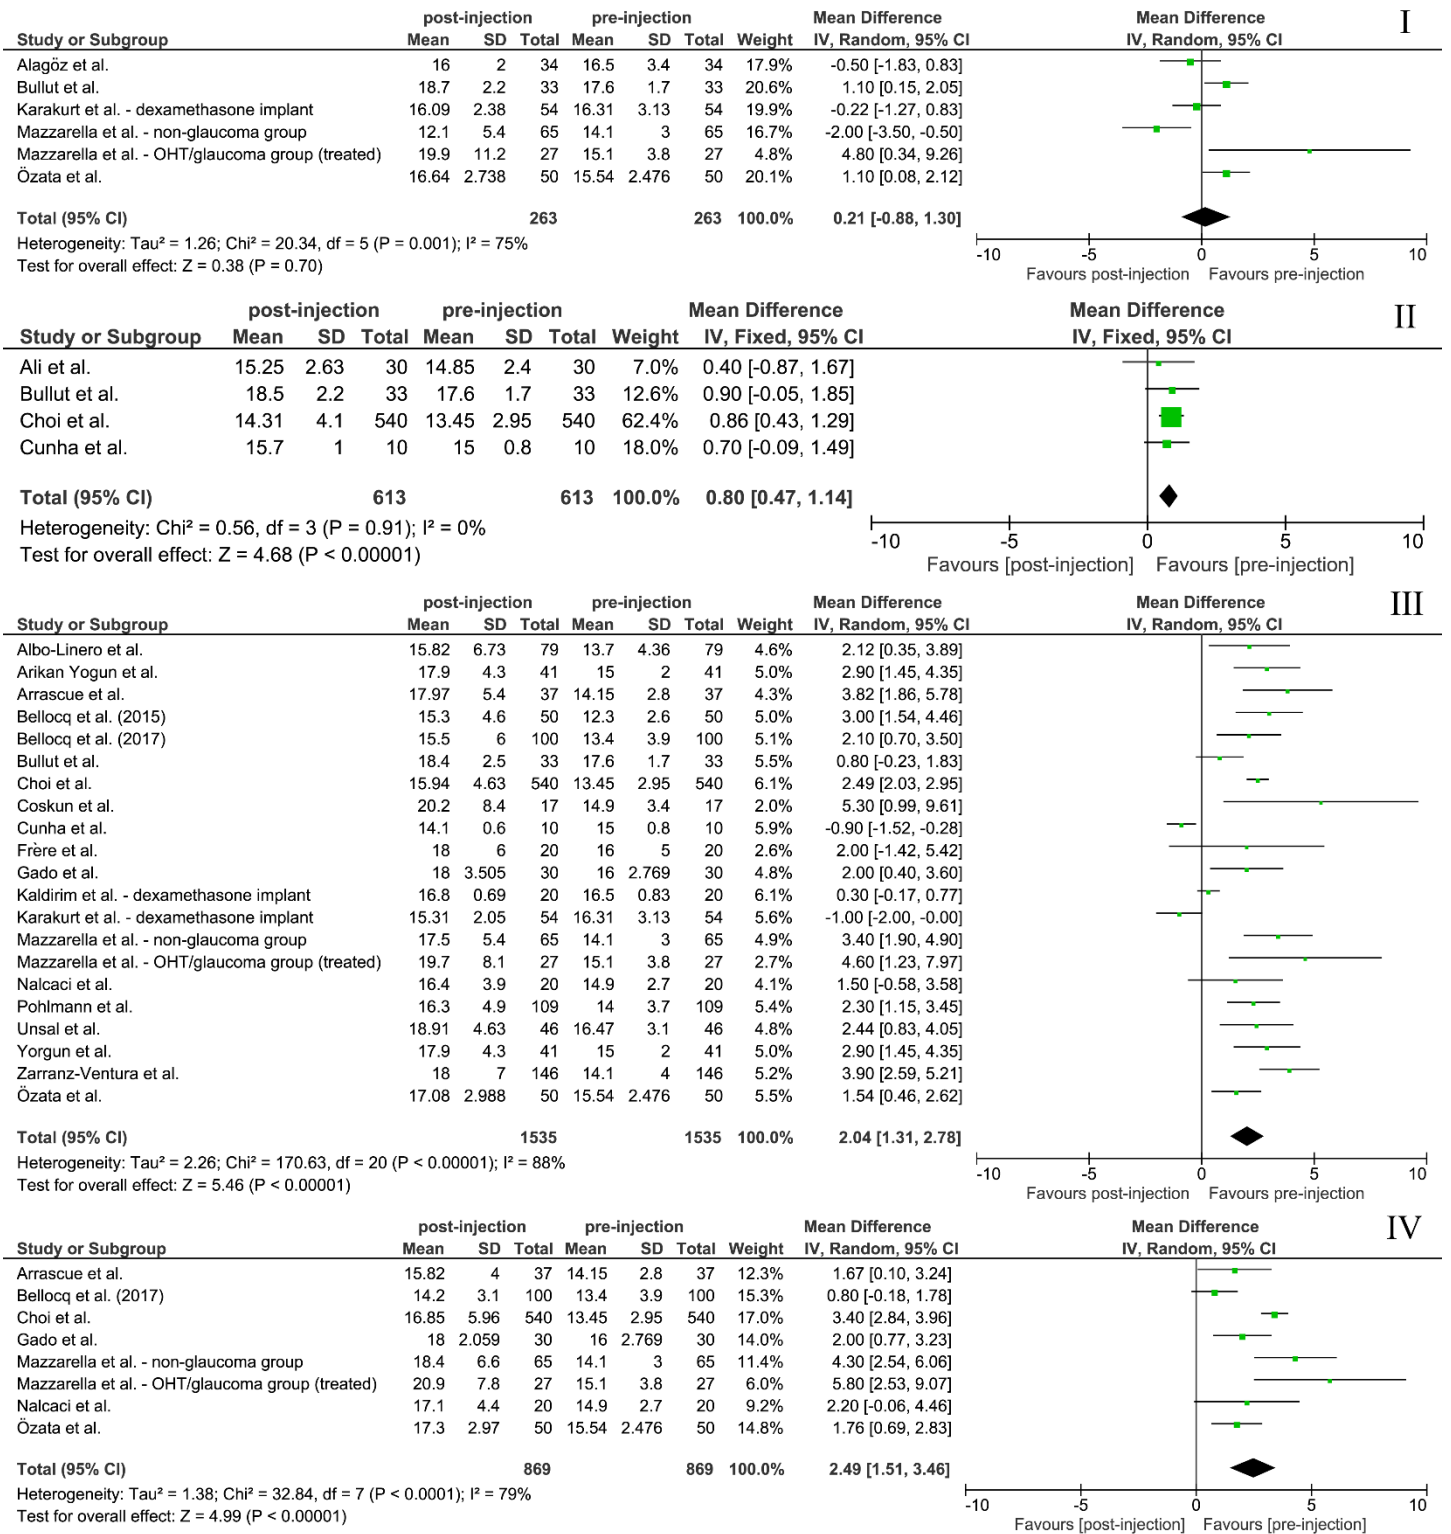

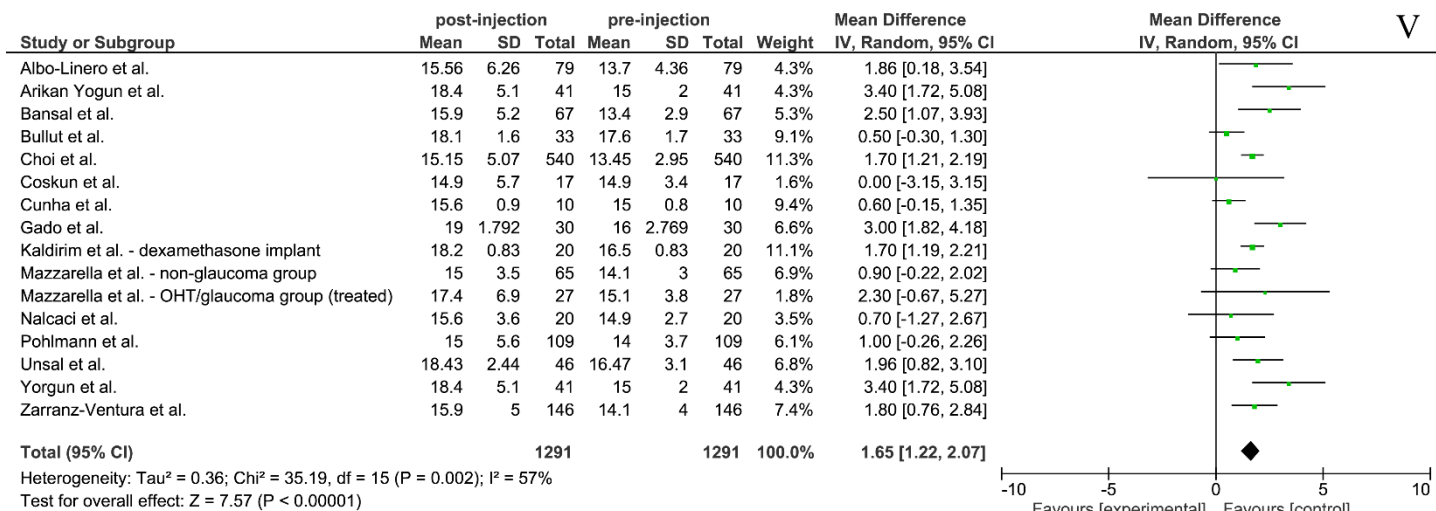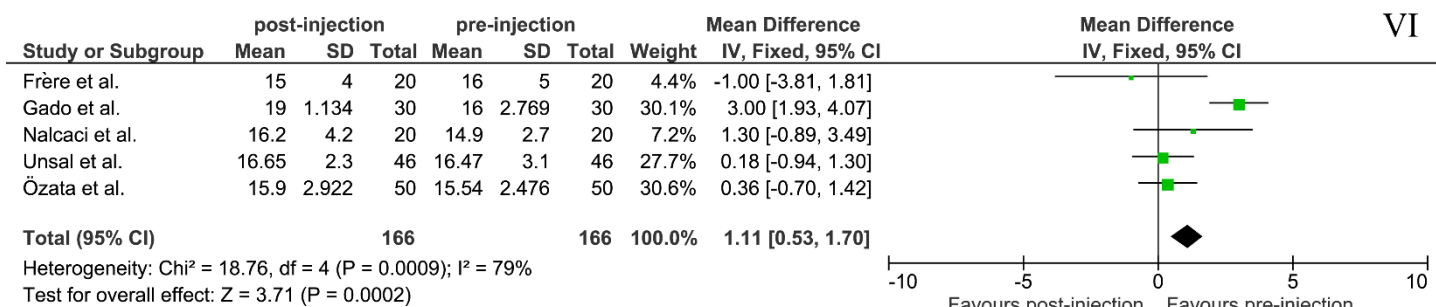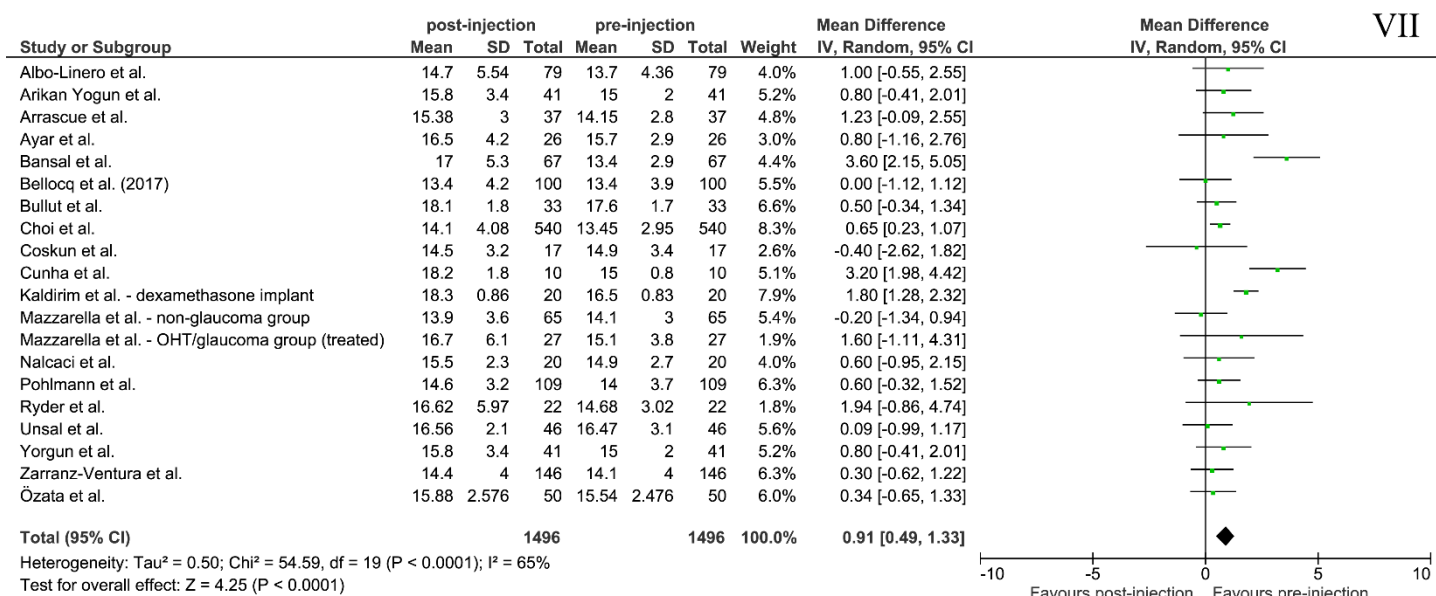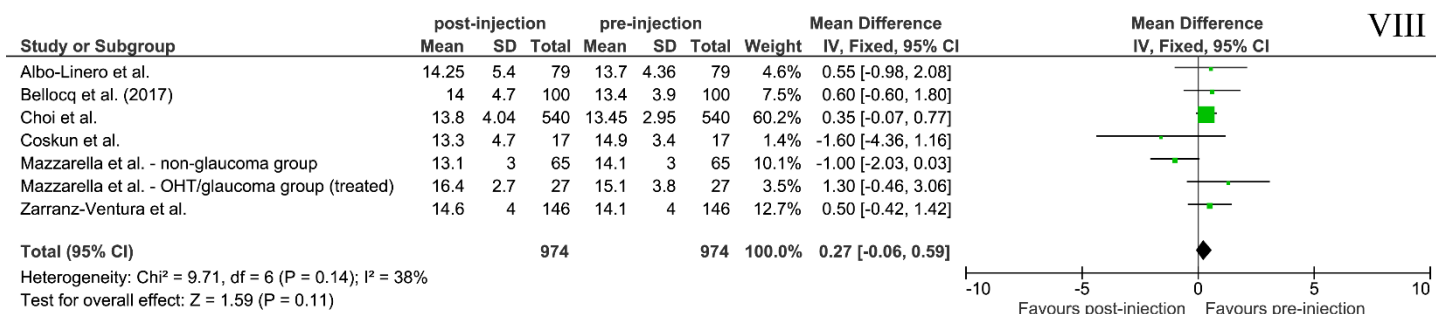

Black diamonds indicate the overall weighted mean difference (WMD). The size of the green box is inversely proportional to the variance. Horizontal lines indicate 95% CI. The vertical line in each panel shows the value for no effect (WMD = 0).

IOP = intra-ocular pressure; CI = confidence interval; SD = standard deviation; I = 1 day after injection; II = 1 week; III = 1 month; IV = 2 months; V = 3 months; VI = 4 months; VII = 6 months; VIII = 12 months.
